# Supplementary material for: A before and after study on personality assessment in adolescents exposed to the 2009 earthquake in L'Aquila, Italy: influence of sports practice
Source: PubMed Central journal article supplement — BMJ Open. 2012 May 31;2(3):e000824. doi: 10.1136/bmjopen-2012-000824 (PMC3367144; doi:10.1136/bmjopen-2012-000824), 2012-05-31

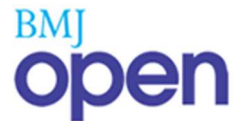

**A longitudinal study on personality assessment of adolescents exposed to the 2009 earthquake in L'Aquila, Italy: influence of sports practice.**

|                                 |                                                                                                                                                                                                                                                                                                                                                                                                                                                                                                                                  |
|---------------------------------|----------------------------------------------------------------------------------------------------------------------------------------------------------------------------------------------------------------------------------------------------------------------------------------------------------------------------------------------------------------------------------------------------------------------------------------------------------------------------------------------------------------------------------|
| Journal:                        | <i>BMJ Open</i>                                                                                                                                                                                                                                                                                                                                                                                                                                                                                                                  |
| Manuscript ID:                  | bmjopen-2012-000824                                                                                                                                                                                                                                                                                                                                                                                                                                                                                                              |
| Article Type:                   | Research                                                                                                                                                                                                                                                                                                                                                                                                                                                                                                                         |
| Date Submitted by the Author:   | 05-Jan-2012                                                                                                                                                                                                                                                                                                                                                                                                                                                                                                                      |
| Complete List of Authors:       | Valenti, Marco; University of L'Aquila, Department of Medicine and Public Health; University of L'Aquila, Department of Applied Clinical Sciences<br>Vinciguerra, Maria Giulia; University of L'Aquila, Dept. Applied Clinical Sciences and Faculty of Sports Science<br>Masedu, Francesco; University of L'Aquila, Department of Medicine and Public Health<br>Tibeti, Sergio; University of L'Aquila, Department of Applied Clinical Sciences<br>Sconci, Vittorio; Local Health Agency of the NHS, Department of Mental Health |
| <b>Primary Subject Heading</b>: | Mental health                                                                                                                                                                                                                                                                                                                                                                                                                                                                                                                    |
| Secondary Subject Heading:      | Public health, Sports and exercise medicine                                                                                                                                                                                                                                                                                                                                                                                                                                                                                      |
| Keywords:                       | MENTAL HEALTH, Child & adolescent psychiatry < PSYCHIATRY, Personality disorders < PSYCHIATRY, PUBLIC HEALTH, disasters                                                                                                                                                                                                                                                                                                                                                                                                          |
|                                 |                                                                                                                                                                                                                                                                                                                                                                                                                                                                                                                                  |

SCHOLARONE™  
Manuscripts

1  
2  
3 **A longitudinal study on personality assessment in adolescents exposed to the 2009 earthquake**  
4  
5 **in L'Aquila, Italy: influence of sports practice.**  
6  
7  
8

9 Marco Valenti <sup>(1)</sup>, Maria Giulia Vinciguerra <sup>(2)</sup>, Francesco Masedu <sup>(1)</sup>, Vittorio Sconci <sup>(3)</sup>  
10  
11

12  
13  
14 <sup>(1)</sup> Department of Medicine and Public Health, University of L'Aquila, L'Aquila, Italy  
15

16 <sup>(2)</sup> Department of Applied Clinical Sciences and School of Sports Sciences, University of L'Aquila,  
17  
18 L'Aquila, Italy  
19

20 <sup>(3)</sup> Local Health Agency of the NHS, Department of Mental Health, L'Aquila, Italy  
21  
22  
23  
24

25 Corresponding author:  
26

27 Marco Valenti M.D.

28 Department of Medicine and Public Health

29 University of L'Aquila

30 Coppito Hospital, Delta 6

31 67100 L'Aquila

32 Email: [marco.valenti@cc.univaq.it](mailto:marco.valenti@cc.univaq.it), phone +390862434659, fax +390862432903  
33  
34  
35  
36  
37  
38

39 Keywords: disaster relief, health status, psychological stress, psychosocial factors, sport  
40  
41  
42

43 Word count: 2302  
44  
45  
46  
47  
48  
49  
50  
51  
52  
53  
54  
55  
56  
57  
58  
59  
60

## Abstract

**Background.** The consequences of earthquakes on psychological health are long-lasting for portions of the population, depending on age, gender, social conditions and individual experiences. Sports activities are considered a factor with which to test the overall earthquake impact on individual and social psychological changes in adolescents.

**Methods** To determine the effect of sports practice on psychological status, a random sample of 179 adolescent subjects who either practiced or did not practice sports (71 vs 108 respectively) were administered the MMPI-A questionnaire in a supervised environment: this study was conducted in L'Aquila, Italy, before the 2009 earthquake. After the earthquake, of the original 179 subjects, 149 were assessed a second time. An unbalanced split plot design, at a 0.05 significance level, was carried out using a linear mixed model with quake, sex and sports practice as predictive factors.

**Results.** Although the overall scores indicated no deviant behaviours in the adolescents tested, changes were detected in many individual content scale scores, including depression (A-dep score Mean±SEM: before quake=47.54±0.73; after quake=52.67±0.86) and social discomfort (A-sod score Mean±SEM: before quake=49.91±0.65; after quake=51.72±0.81). The MMPI-A profiles show different impacts of the earthquake on adolescents according to gender and sport practice.

**Conclusions.** The differences detected in MMPI\_A scores raise issues about social policies required to address the psychological changes in adolescents. The current study supports the idea that sport should be considered part of a coping strategy to assist adolescents in dealing with the psychological effects of the earthquakes on their personalities.

## Summary

Article focus:

Several previous studies addressed specific mental disorders, such as post-traumatic stress disorder or other dimensions of adolescents' well-being after earthquakes and natural disasters. Given the

1  
2  
3 random nature of seismic activity, these studies were not able to perform a pair-wise comparison  
4  
5 pre- and post-event. Such comparisons would be useful in developing both collective and individual  
6  
7 impact assessments for determining appropriate interventions  
8  
9

10 -Sports activities are considered a factor with which to test the overall earthquake impact on  
11  
12 individual and social psychological changes in adolescents.  
13  
14

15  
16  
17  
18  
19 Key messages:

20  
21 The current study suggests an overall positive impact of sports practice on adolescents'  
22  
23 psychological response to natural disasters, thus implying the use of sports practice as a relevant  
24  
25 means for public health interventions in post-disaster environment.  
26  
27  
28  
29  
30  
31

32 Strengths and limitations of this study:

33  
34  
35 -This is the first study describing a "before & after" personality assessment in adolescents through a  
36  
37 disrupting disaster like an earthquake affecting an urban environment, using sports practice as a  
38  
39 relevant means for public health interventions in post-disaster environment.  
40  
41

42  
43 -A major drawback of this study is the lack of adjustment for the socio-economic status of the  
44  
45 subjects ain covariate.  
46  
47  
48  
49  
50  
51  
52  
53  
54  
55  
56  
57  
58  
59  
60

## INTRODUCTION

On April 6, 2009, the city of L'Aquila in the Abruzzo region of Italy was devastated by an earthquake. The population suffered injuries, destruction and 308 deaths, with 67,000 persons displaced to the Abruzzo coast or in living in tents. Consequently, the entire community was impacted in terms of material, social and psychological damages, and security and normalcy was further undermined by frequent aftershocks.

According to studies on the psychological health of seismic victims [1-3], the consequences of earthquakes on psychological health are long-lasting for portions of the population, depending on age, gender, social conditions and individual experiences [4]. Earthquakes occur without warning and give the population no opportunity to make psychological adjustments to deal with the calamity [5]. The lack of predictability, the reminders of the destruction and the need to move because of destroyed homes may all result in serious mental health issues, for example, by lessening or exacerbating the emotional reactions associated with the trauma [6].

Several previous studies addressed specific mental disorders, such as post-traumatic stress disorder [7] or other dimensions of people's well-being after earthquakes and natural disasters [8]. Given the random nature of seismic activity, these studies were not able to perform a pair-wise comparison pre- and post-event. Such comparisons would be useful in developing both collective and individual impact assessments [9] for determining appropriate interventions [10].

Sports activities can be considered a rich context for the construction of personality and for the subjective elaboration of conflicts accrued within family and social contexts [11], making them a reasonable factor with which to test the overall earthquake impact on individual and social psychological changes in adolescents.

The current study contributes to the understanding of the personality profile changes that occur in adolescents after disruptive events like earthquakes. The study includes sports practice as a covariate in exploiting the content scale of the Minnesota Multiphasic Personality Inventory - Adolescents (MMPI-A) [12-14]. Testing began with a cross-sectional survey carried out before the

1  
2  
3 earthquake in the schools of L'Aquila' district that compared the MMPI-A content scales' scores  
4  
5 for the adolescents based on the adolescents' gender and sports practice factors. The cross-sectional  
6  
7 original design changed to a longitudinal design after the earthquake, addressing the need for an  
8  
9 assessment of the overall effect of the seism on personality in adolescents [15]. In addition to  
10  
11 measuring the effects of the earthquake on MMPI-A content scales' scores, it was also possible to  
12  
13 study the effects of gender and sport practice on the content scales' profiles [16].  
14  
15

## 16 17 18 **METHODS** 19

### 20 21 **Subjects** 22

23 The goal of the current study is to assess and estimate the personality changes that occurred before  
24  
25 and after the 2009 earthquake in L'Aquila and to model the ways that the earthquake affected  
26  
27 adolescents according to gender and sport practice.  
28

29 This study took advantage of a prior cross-sectional survey conducted on adolescents (14-18 years  
30  
31 old) that addressed the role of sport in preventing deviant behaviours. A comparison was performed  
32  
33 between adolescents who usually practiced sports and adolescents who did not practice sports.  
34  
35 Sports practice was defined as practicing at least twice per week for a minimum of one hour per  
36  
37 session. The sample recruitment and questionnaire administration took place during February, 2009.  
38  
39 Data analysis had not been performed prior to the night of the earthquake, and the investigation was  
40  
41 suspended. The participants were contacted again a few months after the earthquake, and the  
42  
43 follow-up questionnaires were administered beginning in early January 2010 and concluded in the  
44  
45 second half of May 2010. The questionnaires were administered individually by the same  
46  
47 professional psychologists who administered the questionnaires before the earthquake, all of whom  
48  
49 received specific training on the MMPI-A [17]. Adequate matching of the subjects was ensured by  
50  
51 the experimenters. Exclusion criteria consisted of protocols with a VRIN T-score greater than 74  
52  
53 (considered inconsistent) and protocols containing more than 30 unanswered items. In the present  
54  
55  
56  
57  
58  
59  
60

1  
2  
3 study, 4 girls and 7 boys were excluded during the first administration of the questionnaire and were  
4 removed from further analysis [18].

5  
6  
7 Initially, 179 adolescent subjects (14-18 years old) were randomly sampled from L'Aquila high  
8 schools and were administered the MMPI-A questionnaire in a supervised environment. Participants  
9 included 87 boys and 92 girls, who either practiced sports (71 total subjects) or did not usually  
10 practice sports (108 total subjects). The sample included 60 girls and 48 boys who did not usually  
11 practice sports, compared with 32 girls and 39 boys who did practice sports. The original research  
12 question for the current study was the assessment of the effects of sports practice on the average  
13 MMPI-A content scales' scores. After the earthquake, the research goal was redefined to address  
14 the assessment of the earthquake's psychological impact on adolescents according to gender and  
15 sports practice. Of the original 179 subjects, 149 (70 boys and 79 girls) were assessed a second  
16 time. Of the 149 subjects reassessed, 31 boys and 27 girls continued to practice sports activities. In  
17 the absence or presence of sport practice we recorded, respectively, a follow up loss in the  
18 subgroups of 18.75% and 20.52% for boys, and 13.33% and 15.62 for girls.

19  
20  
21 A written informed consent form was provided to the adolescents' parents or to persons possessing  
22 parental rights. The study was conducted according to the Helsinki Declaration.

## 23 24 25 26 27 28 29 30 31 32 33 34 35 36 37 38 39 40 41 **Measures**

42  
43 The subjects' responses were assessed using the Italian version of the MMPI-A content scales using  
44 the uniform T-score conversions (see Table 1), for boys and girls [13]. These conversions allowed  
45 comparison of scores obtained from different scales so that, on average, it was possible to see  
46 changes in the psychological profile of the population examined.

47  
48  
49 Features and characteristics measured by the MMPI or MMPI-A in the assessment of adolescents  
50 serve to describe the teenagers at the moment of testing. Adolescents' test scores often do not  
51 provide the types of data necessary to make accurate long-term predictions concerning personality  
52 functioning [13].

1  
2  
3 MMPI profile changes are due to frequent behavioural changes over time because of the "transient  
4 organisation of the personality" during adolescence [19]. According to the transience perspective,  
5 such psychometric changes are more attributable to the sensitivity of the MMPI to ongoing change  
6 during adolescence than to test structure problems.  
7  
8

9  
10  
11 Considering that the current study estimates the average effects on profile changes after an  
12 earthquake, the use of MMPI-A in the current study is supported by the literature, which indicates  
13 that the MMPI/MMPI-A is best used as a means of deriving an overall estimate and current  
14 description of adolescents' psychological profiles with no predictive long-range aims.  
15  
16  
17  
18  
19  
20  
21  
22

### 23 **Statistical Analysis**

24  
25 An unbalanced split plot design [20] at a 0.05 significance level was carried out using a linear  
26 mixed model [21] with earthquake, gender, and sports practice as predictive factors. The  
27 unbalanced design permitted accounting for the covariance among the repeated measures. The  
28 model was run for each of the response variables predicted by content scales that were significant in  
29 terms of overall Log likelihood ratio ( $p < 0.05$ ). For each content scale, the intra-class correlation  
30 was calculated (see Table 2), ranging from a minimum for A-cyn (Mean=0.86, SEM=0.02) to a  
31 maximum for A-hea (Mean=0.96, SEM=0.006).  
32  
33  
34  
35  
36  
37  
38  
39

40 The statistical analysis was carried out using the statistical software STATA version 11.  
41  
42  
43  
44

### 45 **RESULTS**

46  
47 The analysis estimated the impact of the earthquake, gender, sports practice and the two- and three-  
48 way interactions on each of the fifteen content scales of the MMPI-A questionnaire. Table 2 reports  
49 the results of the linear mixed models, which clarify the importance of the earthquake factor on  
50 every content scale except for A-trt (Adolescent negative treatment indication), which is not  
51 significant at  $p = 0.387$ . The profile variations for the factors of gender and sport are shown in Fig. 1-  
52  
53  
54  
55  
56  
57  
58  
59  
60  
61  
62  
63  
64  
65  
66  
67  
68  
69  
70  
71  
72  
73  
74  
75  
76  
77  
78  
79  
80  
81  
82  
83  
84  
85  
86  
87  
88  
89  
90  
91  
92  
93  
94  
95  
96  
97  
98  
99  
100



1  
2  
3 affects the following content scales with statistically significant coefficients: A-anx ( $-3.42 \pm 1.58$ ,  
4  $p=0.03$ ), A-obs ( $4.12 \pm 1.60$ ,  $p=0.01$ ), A-ang ( $-6.52 \pm 1.45$ ,  $p=0.00$ ), A-sod ( $-2.82 \pm 1.47$ ,  $p=0.05$ ), A-  
5  
6  
7 fam ( $-5.08 \pm 1.49$ ,  $p=0.001$ ), and A-sch ( $-3.50 \pm 1.73$ ,  $p=0.04$ ). Despite the expected differences  
8  
9  
10 among those who practice sports, different response patterns were observed for different content  
11  
12  
13 scales and were characterised by different interactions. For A-anx, there were different responses to  
14  
15  
16 the quake according to both gender ( $2.13 \pm 0.76$ ,  $p=0.005$ ) and sports practice ( $-3.43 \pm 0.78$ ,  $p=0.00$ ).  
17  
18  
19 The last observation indicated that boys who practiced sports after the earthquake showed an  
20  
21  
22 average reduction of 3.43 points in their A-anx scores compared with the boys who did not usually  
23  
24  
25 practice sports. The same protective pattern appears for girls who practiced sports vs. those who did  
26  
27  
28 not practice sports.

29  
30  
31  
32  
33  
34  
35  
36  
37  
38  
39  
40  
41  
42  
43  
44  
45  
46  
47  
48  
49  
50  
51  
52  
53  
54  
55  
56  
57  
58  
59  
60  
Girls and boys perform differently with respect to A-dep ( $-4.25 \pm 1.60$ ,  $p=0.008$ ), i.e., depression, as  
characterised by A-dep, changed in relation to the earthquake and sport factors.

As measured by the MMPI-A, the situation for the adolescents living in L'Aquila is worse two  
years after the earthquake compared with before the earthquake. The factors negatively affected  
post-earthquake include personality discomfort; low self esteem; anger; family issues; problems at  
school, with different grades for boys and girls [22]; and decreased sports participation rates. The  
above results are consistent with other recent studies in literature about the changes in  
pharmaceutical consumption in the overall population after the seism [23].

Social discomfort and family problems, among other scales examined, behaved differently,  
according to the different interactions of boys and girls with the earthquake impact factor. These  
factors are sources of concern for decision makers and administrators because they are usually  
associated with communication problems between the most important actors in the education of  
adolescents, namely, the family and the school. The problems observed above are expected, given  
the lack of opportunity to encounter other adolescents as well as lack of important leisure  
experiences due to the destruction of the urban environment [24].

1  
2  
3 Unexpectedly, anger increased over time (see Table 2) but was not moderated by the earthquake-  
4 sport interaction ( $p=0.20$ ). It seems plausible that sport is a good tool for controlling anger during  
5 normal events and especially during extreme events [25]; therefore, further investigation is required  
6 to determine whether the result is genuine or an artefact of the questionnaire used. The variable A-  
7 cyn, which describes misanthropic beliefs according to MMPI-A, does not show a statistically  
8 significant interaction between the earthquake occurrence and sport activity ( $p=0.17$ ), i.e., there is  
9 no group-specific trend of adolescents who practice sports compared with the adolescents who do  
10 not practice sports. A summary of the sport factor indicates that there is no statistically significant  
11 interaction between the earthquake's impact and the sport variable for A-dep, A-aln, A-ang, A-cyn,  
12 A-lse, or A-fam (see Table 2).  
13  
14  
15  
16  
17  
18  
19  
20  
21  
22  
23  
24  
25  
26

## 27 DISCUSSION

28  
29 The primary purpose of this study was the public health concern of adolescents' well-being post-  
30 earthquake rather than an examination of psychopathologies in adolescents. The study did not  
31 include "pathological subjects"; thus, the scores of the MMPI-A content scales were not high in  
32 magnitude but still presented significant variations in the subjects' personality profiles [26].  
33  
34  
35  
36  
37

38 Despite the unusual context of its use, the current application of the MMPI-A appears to be  
39 promising as a method of population analysis after disasters because of the rich psychological  
40 profile descriptions obtained and the identification of critical psychological dimensions among the  
41 population [27].  
42  
43  
44  
45  
46

47 The current analysis suggests the importance of amateur sport practice in addressing psychological  
48 and personality problems that are associated with or exacerbated by the disruption of everyday life  
49 due to natural catastrophic events. When based on expectations about one's own time and leisure,  
50 choosing to practice sports appears to reveal deep psychological patterns that affect social  
51 interaction and personal self-estimation. The comparisons in this study provide evidence that  
52 adolescents exposed to sports show a better response to extreme situations such as earthquakes  
53  
54  
55  
56  
57  
58  
59  
60

1  
2  
3 when compared with adolescents not exposed to sports. One possible mechanism for this better  
4  
5 response is that sports practice prevents more serious psychological problems from developing. The  
6  
7 evidence presented above indicates a possible method for coping with the social discomfort and  
8  
9 other psychological issues experienced by adolescents who suffer through natural catastrophes [28].  
10  
11 The inclusion of sports practice could be a qualifying feature of the catastrophe managing policy for  
12  
13 adolescents.

14  
15  
16 Suggestions for further study include estimation of the “elasticity” of the personality profile  
17  
18 changes, i.e., identification of the amount of time required to return to the pre-quake mental health  
19  
20 condition and the eventual memory effects of the earthquake regarding the items involved in the  
21  
22 analysis [29].  
23

24  
25 The limitations of the present study include the restriction of analysis to the factors of gender and  
26  
27 sports practice that were chosen at the study onset. Nevertheless, the present study promoted the  
28  
29 evaluation of important aspects of adolescent mental health that are not currently being addressed  
30  
31 by the healthcare decision makers in favour of the growth of psychotropic drugs [23].  
32

33  
34 A major drawback of this study is the lack of adjustment for the socio-economic status of the  
35  
36 subjects [30]. The cross-sectional survey carried out before the earthquake used the density of  
37  
38 inhabitants per room (DIR), or the ratio of people dwelling in a house and the number of rooms  
39  
40 occupied including kitchen, living room and bathrooms, as a proxy covariate of socio-economic  
41  
42 status. The inclusion of DIR allowed a basic knowledge of the social condition of all the  
43  
44 adolescents interviewed. After the earthquake, DIR was no longer representative of socio-economic  
45  
46 status for most subjects because these subjects were no longer able to precisely indicate their  
47  
48 housing status. This consideration forced the authors to discard DIR as a relevant variable.  
49  
50 However, it is plausible that this lack of information parallels the behaviour of the factor  
51  
52 earthquake. Statistically speaking, socio-economic status is expected to have some collinearity with  
53  
54 the quake factor [31], but this cannot be accounted for exactly in the present study, and it is not  
55  
56  
57  
58  
59  
60

1  
2  
3 possible to suggest a design that accounts for these factors because of the randomness of  
4  
5 earthquakes' occurrences.

6  
7 In conclusion, the results of the current study show an overall positive impact of sports practice on  
8  
9 adolescents' psychological response to natural disasters.  
10

#### 11 12 13 14 **LICENCE FOR PUBLICATION**

15  
16 The Corresponding Author has the right to grant on behalf of all authors and does grant on behalf of  
17  
18 all authors, an exclusive licence on a worldwide basis to the BMJ Publishing Group Ltd and its  
19  
20 Licensees to permit this article (if accepted) to be published in JECH editions and any other  
21  
22 BMJ PGL products to exploit all subsidiary rights, as set out in licence  
23  
24 (<http://group.bmj.com/products/journals/instructions-for-authors/licence-forms/>).  
25  
26  
27  
28

#### 29 30 **COMPETING INTEREST**

31  
32 None to declare.  
33  
34  
35

#### 36 37 **FUNDING STATEMENT**

38  
39 This research received no specific grant from any funding agency in the public, commercial or not-  
40  
41 for-profit sectors.  
42  
43  
44

#### 45 46 **CONTRIBUTORSHIP STATEMENT**

47  
48 Marco Valenti was the principal investigator, conceived and designed the study protocol, and  
49  
50 provided final interpretation of data.

51  
52 Maria Giulia Vinciguerra participated in designing the study, questionnaire administration, and  
53  
54 interpretation of data.  
55

56  
57 Francesco Masedu performed the statistical data analysis.

58  
59 Vittorio Sconci participated in designing the study protocol and interpretation of data.  
60

1  
2  
3 All authors gave substantial contribution to manuscript writing and editing.  
4  
5  
6

7 **DATA SHARING**  
8

9 No additional unpublished data from the study are available.  
10  
11  
12  
13  
14  
15  
16  
17  
18  
19  
20  
21  
22  
23  
24  
25  
26  
27  
28  
29  
30  
31  
32  
33  
34  
35  
36  
37  
38  
39  
40  
41  
42  
43  
44  
45  
46  
47  
48  
49  
50  
51  
52  
53  
54  
55  
56  
57  
58  
59  
60

For peer review only

## REFERENCES

- 1 Asarnow J, Glynn S, Pynoos RS, et al. When the earth stops shaking: Earthquake sequelae among children diagnosed for pre-earthquake psychopathology. *J Am Acad Child Adolesc Psychiatry*. 1999;**38**:1016-23.
- 2 Carr VJ, Lewin TJ, Welster RA, et al. A synthesis of the findings from the Quake Impact Study: a two-year investigation of the psychosocial sequelae of the 1989 Newcastle earthquake. *Soc Psychiatry Psychiatr Epidemiol*. 1997;**32**:123-36
- 3 Joris Yzermas C, Donker GA, Kerssens JJ, et al. Health problems of victims before and after disaster: a longitudinal study in general practice. *Int J Epidemiol*. 2005;**34**:820-6
- 4 Udwin O, Boyle S, Yule W, et al. Risk factors for long-term psychological effects of a disaster experienced in adolescence: predictors of post traumatic stress disorder. *J Child Psychiatry*. 2000;**41**:969-79.
- 5 Shannon MP, Lonigan CJ, Finch AJ Jr., et al. Children exposed to disaster: I. Epidemiology of post-traumatic symptoms and symptom profiles. *J Am Acad Child Adolesc Psychiatry*. 1994;**33**,80-93.
- 6 Zhang Z, Shi Z, Wang L, et al. One year later: Mental health problems among survivors in hard-hit areas of the Wenchuan earthquake. *Public Health*. 2011;**125**:293-300.
- 7 Goenjian AK, Molina L, Steinberg AM, et al. Post traumatic stress and depressive reactions among adolescents after Hurricane Mitch. *Am J Psychiatry*. 2001;**158**:788-94.
- 8 John PB, Russell S, Russell PS. The prevalence of posttraumatic stress disorder among children and adolescents affected by tsunami disaster in Tamil Nadu. *Disaster Manag Response*. 2007;**5**:3-7.
- 9 Ambrose PA. Challenges for mental health service providers: The perspective of managed care organizations. In: Butcher JN, Ed. *Personality assessment in managed care: Using the MMPI-2 in treatment planning*. New York: Oxford University Press 1997:61-72.

- 1  
2  
3 10 Chandra A, Acosta JD. Disaster Recovery Also Involves Human Recovery. *JAMA*.  
4  
5 2010;**304**:1608-9.  
6  
7 11 Varghese SB. Cultural, ethical, and spiritual implications of natural disasters from the  
8  
9 survivors' perspective. *Crit Care Nurs Clin North Am*. 2010;**22**:515-22.  
10  
11 12 Butcher JN, Williams CL, Graham JR, et al. Il MMPI per gli adolescenti (Sirigatti S,  
13  
14 Pancheri P, Eds). Firenze, Giunti OS, 2001.  
15  
16 13 Archer RP. MMPI-A: Assessing Adolescents Psychopathology. London, Lawrence Elbaum  
17  
18 Associates Publishers, 2005.  
19  
20 14 Butcher JN, Williams CL, Graham JR, et al. Manual for administration, scoring, and  
21  
22 interpretation of the Minnesota Multiphasic Personality Inventory for Adolescents: MMPI-  
23  
24 A. Minneapolis, University of Minnesota Press, 1992.  
25  
26 15 Twisk JWR. Applied longitudinal data analysis for epidemiology. Cambridge, Cambridge  
27  
28 University Press, 2003.  
29  
30 16 Eisenman DP, Zhou Q, Ong M, et al. Variations in disaster preparedness by mental health,  
31  
32 perceived general health, and disability status. *Disaster Med Public Health Preparedness*.  
33  
34 2009;**3**:33-41.  
35  
36 17 Allard G, Faust D. Errors in scoring objective personality tests. *Assessment*. 2000;**7**:119-29.  
37  
38 18 Hand CG, Archer RP, Handel RW, Forbey JD. The classification accuracy of the Minnesota  
39  
40 Multiphasic Personality Inventory-Adolescent: effects of modifying the normative sample.  
41  
42 *Assessment*. 2007;**14**:80-5.  
43  
44 19 Hathaway SR, Monachesi ED. Adolescent personality and behavior: MMPI patterns of  
45  
46 normal, delinquent, dropout, and other outcomes. Minneapolis, University of Minnesota  
47  
48 Press, 1963.  
49  
50 20 Chou FH, Wu HC. Chou P, et al. Epidemiologic psychiatric studies on post-disaster impact  
51  
52 among Chi-Chi earthquake survivors in Yu-Chi, Taiwan. *Psychiatry Clin Neurosci*.  
53  
54 2007;**61**:370-8.  
55  
56  
57  
58  
59  
60

- 1  
2  
3 21 Fitzmaurice G, Laird NM, Ware JH. Applied longitudinal data analysis. Hoboken NJ, John  
4  
5 Wiley & Sons 2004:188-189.  
6  
7 22 Arbisi PA, Butcher JN. Relationship between personality and health symptoms: Use of the  
8  
9 MMPI-2 in medical assessments. *Int J Clin Health Psychol.* 2004;**4**:571-95.  
10  
11 23 Rossi A, Stratta P, Allegrini F. Changes in prescription of psychotropics after an earthquake  
12  
13 in Italy. *Psichiatr Serv.* 2010;**61**:845-6.  
14  
15 24 Oyama M, Nakamura K, Suda Y, et al. Social network disruption as a major factor  
16  
17 associated with psychological distress 3 years after the 2004 Niigata-Chuetsu earthquake in  
18  
19 Japan. *Environ Health Prev Med.* 2011; Jun 28 Epub ahead of print.  
20  
21 25 Piko BF, Keresztes N. Self-perceived health among early adolescents: role of psychosocial  
22  
23 factors. *Pediatr Int.* 2007;**49**:577-83.  
24  
25 26 Bowling A. Mode of questionnaire administration can have serious effects on data quality. *J*  
26  
27 *Public Health.* 2005;**27**:281-91.  
28  
29 27 Weinberger M, Oddone EZ, Samsa GP, et al. Are health-related quality of life measures  
30  
31 affected by mode of administration? *J Clin Epidemiol.* 1996;**49**:135-40.  
32  
33 28 Nivolianitou Z, Synodinou B. Towards emergency management of natural disasters and  
34  
35 critical accidents: The Greek experience. *J Environ Manag.* 2011;**92**:2657-65  
36  
37 29 Weiss JW, Mouttapa M, Cen S, Johnson CA, Unger J. Longitudinal effects of hostility,  
38  
39 depression, and bullying on adolescent smoking initiation. *J Adolesc Health.* 2011;**48**:591-  
40  
41 6.  
42  
43 30 Ahern J, Galea S. Social context and depression after a disaster: the role of income  
44  
45 inequality. *J Epidemiol Community Health.* 2006;**60**:766-70.  
46  
47  
48  
49  
50  
51  
52  
53  
54  
55  
56  
57  
58  
59  
60



**Table 1.** Average uniform T-scores for the MMPI-A content scales

|                        |                         | A-anx                  | A-obs                   | A-dep                 | A-hea | A-alm | A-biz | A-ang | A-cyn | A-con | A-lse | A-las | A-sod | A-fam | A-sch | A-trt |       |       |       |       |       |
|------------------------|-------------------------|------------------------|-------------------------|-----------------------|-------|-------|-------|-------|-------|-------|-------|-------|-------|-------|-------|-------|-------|-------|-------|-------|-------|
| <b>Boys</b>            | <b>Before the quake</b> | <b>Sport Practice</b>  | No                      | Mean                  | 47.10 | 45.33 | 45.38 | 43.27 | 48.88 | 50.98 | 48.63 | 43.00 | 48.35 | 45.13 | 47.56 | 49.75 | 51.92 | 44.58 | 50.38 |       |       |
|                        |                         |                        | SEM                     | 1.58                  | 1.41  | 1.41  | 1.05  | 1.58  | 1.69  | 1.32  | 1.32  | 1.42  | 1.55  | 1.13  | 1.27  | 1.43  | 1.68  | 1.84  |       |       |       |
|                        |                         | <b>Sport Practice</b>  | Yes                     | Mean                  | 41.41 | 50.56 | 45.15 | 46.36 | 45.54 | 48.38 | 42.74 | 44.00 | 49.56 | 42.18 | 46.13 | 43.33 | 45.95 | 39.79 | 45.56 |       |       |
|                        |                         |                        | SEM                     | 1.21                  | 1.47  | 1.55  | 1.52  | 1.90  | 2.05  | 1.19  | 1.30  | 1.63  | 1.13  | 1.59  | 1.28  | 1.47  | 1.04  | 1.69  |       |       |       |
|                        |                         | <b>After the quake</b> | <b>Sport Practice</b>   | No                    | Mean  | 54.23 | 50.36 | 50.38 | 46.44 | 48.79 | 57.95 | 48.90 | 45.00 | 52.51 | 48.08 | 53.46 | 52.59 | 55.21 | 49.64 | 47.69 |       |
|                        |                         |                        |                         | SEM                   | 1.51  | 1.59  | 1.61  | 1.36  | 1.91  | 1.87  | 1.65  | 1.40  | 1.63  | 1.43  | 1.81  | 1.85  | 1.52  | 2.21  | 1.96  |       |       |
|                        | <b>Sport Practice</b>   |                        | Yes                     | Mean                  | 54.23 | 50.36 | 50.38 | 46.44 | 48.79 | 57.95 | 48.90 | 45.00 | 52.51 | 48.08 | 53.46 | 52.59 | 55.21 | 49.64 | 47.69 |       |       |
|                        |                         |                        | SEM                     | 1.51                  | 1.59  | 1.61  | 1.36  | 1.91  | 1.87  | 1.65  | 1.40  | 1.63  | 1.43  | 1.81  | 1.85  | 1.52  | 2.21  | 1.96  |       |       |       |
|                        | <b>Girls</b>            |                        | <b>Before the quake</b> | <b>Sport Practice</b> | No    | Mean  | 46.42 | 46.33 | 50.68 | 52.80 | 49.43 | 53.32 | 50.53 | 44.08 | 48.48 | 45.52 | 52.60 | 48.00 | 50.52 | 49.97 | 49.72 |
|                        |                         |                        |                         |                       | SEM   | 1.10  | 1.27  | 1.29  | 1.07  | 1.53  | 1.62  | 1.22  | 1.06  | 1.35  | 1.12  | 1.45  | 1.11  | 1.10  | 1.45  | 1.43  |       |
|                        |                         | <b>Sport Practice</b>  |                         | Yes                   | Mean  | 45.34 | 49.31 | 47.81 | 53.84 | 48.63 | 54.41 | 43.34 | 45.63 | 49.69 | 51.72 | 53.41 | 48.88 | 46.34 | 47.78 | 49.91 |       |
|                        |                         |                        |                         | SEM                   | 1.85  | 1.72  | 1.50  | 1.67  | 2.01  | 2.13  | 1.54  | 1.65  | 1.78  | 2.24  | 2.42  | 1.50  | 1.44  | 1.48  | 2.21  |       |       |
| <b>After the quake</b> |                         | <b>Sport Practice</b>  |                         | No                    | Mean  | 56.00 | 52.04 | 55.56 | 57.40 | 49.52 | 53.58 | 55.56 | 45.40 | 50.88 | 45.87 | 55.48 | 52.13 | 54.02 | 49.17 | 49.21 |       |
|                        |                         |                        |                         | SEM                   | 1.53  | 1.37  | 1.64  | 1.12  | 1.58  | 1.45  | 1.31  | 1.54  | 1.49  | 1.17  | 1.52  | 1.14  | 1.21  | 1.58  | 1.77  |       |       |
| <b>After the quake</b> | <b>Sport Practice</b>   | Yes                    | Mean                    | 47.11                 | 54.85 | 54.07 | 51.30 | 46.93 | 56.78 | 48.00 | 48.52 | 50.44 | 46.74 | 48.41 | 55.63 | 49.63 | 50.48 | 45.96 |       |       |       |
|                        |                         | SEM                    | 1.61                    | 1.74                  | 1.82  | 1.55  | 2.11  | 1.78  | 1.37  | 1.29  | 1.68  | 1.42  | 2.23  | 1.94  | 2.09  | 2.26  | 2.19  |       |       |       |       |

**Content Scales Legend**

- A-anx: Anxiety Scale
- A-obs: Obsessiveness Scale
- A-dep: Depression Scale
- A-hea: Health Concerns Scale
- A-alm: Alienation Scale
- A-biz: Bizarre Mentation Scale
- A-ang: Anger Scale
- A-cyn: Cynism Scale
- A-con: Conduct problems Scale
- A-lse: Low Self-Esteem Scale
- A-las: Low aspirations Scale
- A-sod: Social Discomfort Scale
- A-fam: Family Problems Scale
- A-sch: School problems Scale
- A-trt: Negative Treatment Indicators Scale

**Table 2.** Uniform T-Score Response Linear Mixed Models for MMPI-A content scales\*.

**Model coefficients**

| Uniform T-Score Response | $\beta_{\text{quake}} \pm \text{SEM}$<br>(Prob> z ) | $\beta_{\text{sex}} \pm \text{SEM}$<br>(Prob> z ) | $\beta_{\text{sport}} \pm \text{SEM}$<br>(Prob> z ) | $\beta_{\text{quake} * \text{sport}} \pm \text{SEM}$<br>(Prob> z ) | $\beta_{\text{quake} * \text{sex}} \pm \text{SEM}$<br>(Prob> z ) | $\beta_0 \pm \text{SEM}$<br>(Prob> z ) | Intraclass Correlation<br>ICC $\pm$ SEM |
|--------------------------|-----------------------------------------------------|---------------------------------------------------|-----------------------------------------------------|--------------------------------------------------------------------|------------------------------------------------------------------|----------------------------------------|-----------------------------------------|
| <b>A-anx</b>             | 10.24 $\pm$ 0.59<br>(0.00)                          | -1.15 $\pm$ 1.54<br>(0.46)                        | -3.42 $\pm$ 1.58<br>(0.03)                          | -3.44 $\pm$ 0.78<br>(0.00)                                         | 2.13 $\pm$ 0.76<br>(0.005)                                       | 47.23 $\pm$ 1.20<br>(0.00)             | 0.89 $\pm$ 0.02                         |
| <b>A-obs</b>             | 9.24 $\pm$ 0.45<br>(0.00)                           | -0.10 $\pm$ 1.56<br>(0.95)                        | 4.12 $\pm$ 1.60<br>(0.01)                           | -2.63 $\pm$ 0.60<br>(0.00)                                         | -2.28 $\pm$ 0.59<br>(0.00)                                       | 45.93 $\pm$ 1.22<br>(0.00)             | 0.94 $\pm$ 0.01                         |
| <b>A-dep</b>             | 7.52 $\pm$ 0.53<br>(0.00)                           | -4.25 $\pm$ 1.60<br>(0.01)                        | -1.52 $\pm$ 1.63<br>(0.35)                          | 0.64 $\pm$ 0.71<br>(0.37)                                          | 0.31 $\pm$ 0.70<br>(0.66)                                        | 50.21 $\pm$ 1.24<br>(0.00)             | 0.92 $\pm$ 0.01                         |
| <b>A-hea</b>             | 5.97 $\pm$ 0.31<br>(0.00)                           | -8.72 $\pm$ 1.32<br>(0.00)                        | 2.08 $\pm$ 1.35<br>(0.12)                           | -5.48 $\pm$ 0.41<br>(0.00)                                         | 0.06 $\pm$ 0.40<br>(0.89)                                        | 52.44 $\pm$ 1.03<br>(0.00)             | 0.96 $\pm$ 0.01                         |
| <b>A-aln</b>             | 1.96 $\pm$ 0.62<br>(0.002)                          | -1.56 $\pm$ 1.88<br>(0.002)                       | -2.09 $\pm$ 1.92<br>(0.28)                          | 1.54 $\pm$ 0.83<br>(0.07)                                          | 2.98 $\pm$ 0.81<br>(0.00)                                        | 49.88 $\pm$ 1.46<br>(0.00)             | 0.92 $\pm$ 0.01                         |
| <b>A-biz</b>             | 3.51 $\pm$ 0.45<br>(0.00)                           | -3.80 $\pm$ 1.90<br>(0.05)                        | -0.78 $\pm$ 1.94<br>(0.68)                          | 1.41 $\pm$ 0.60<br>(0.02)                                          | 6.83 $\pm$ 0.58<br>(0.00)                                        | 53.97 $\pm$ 1.48<br>(0.00)             | 0.96 $\pm$ 0.01                         |
| <b>A-ang</b>             | 7.09 $\pm$ 0.41<br>(0.00)                           | -1.38 $\pm$ 1.42<br>(0.33)                        | -6.52 $\pm$ 1.45<br>(0.00)                          | 0.70 $\pm$ 0.55<br>(0.20)                                          | -3.41 $\pm$ 0.54<br>(0.00)                                       | 50.30 $\pm$ 1.10<br>(0.00)             | 0.94 $\pm$ 0.01                         |
| <b>A-cyn</b>             | 3.46 $\pm$ 0.62<br>(0.00)                           | -1.34 $\pm$ 1.44<br>(0.35)                        | 1.20 $\pm$ 1.47<br>(0.41)                           | 1.14 $\pm$ 0.82<br>(0.17)                                          | 0.94 $\pm$ 0.81<br>(0.24)                                        | 44.20 $\pm$ 1.12<br>(0.00)             | 0.87 $\pm$ 0.02                         |
| <b>A-con</b>             | 5.75 $\pm$ 0.40<br>(0.00)                           | -0.13 $\pm$ 1.62<br>(0.94)                        | 1.20 $\pm$ 1.65<br>(0.47)                           | -3.44 $\pm$ 0.53<br>(0.00)                                         | 0.64 $\pm$ 0.52<br>(0.21)                                        | 48.48 $\pm$ 1.26<br>(0.00)             | 0.96 $\pm$ 0.01                         |
| <b>A-lse</b>             | 1.25 $\pm$ 0.49<br>(0.01)                           | -4.02 $\pm$ 1.53<br>(0.01)                        | 1.55 $\pm$ 1.56<br>(0.32)                           | -1.12 $\pm$ 0.65<br>(0.08)                                         | 6.71 $\pm$ 0.64<br>(0.00)                                        | 47.13 $\pm$ 1.19<br>(0.00)             | 0.93 $\pm$ 0.01                         |
| <b>A-las</b>             | 3.69 $\pm$ 0.65<br>(0.00)                           | -5.93 $\pm$ 1.73<br>(0.001)                       | -0.33 $\pm$ 1.77<br>(0.85)                          | -1.71 $\pm$ 0.87<br>(0.04)                                         | 6.74 $\pm$ 0.85<br>(0.00)                                        | 52.99 $\pm$ 1.35<br>(0.00)             | 0.89 $\pm$ 0.01                         |
| <b>A-sod</b>             | 6.46 $\pm$ 0.47<br>(0.00)                           | -1.15 $\pm$ 1.44<br>(0.43)                        | -2.83 $\pm$ 1.47<br>(0.05)                          | 1.83 $\pm$ 0.63<br>(0.004)                                         | -1.62 $\pm$ 0.61<br>(0.01)                                       | 49.29 $\pm$ 1.12<br>(0.00)             | 0.92 $\pm$ 0.01                         |
| <b>A-fam</b>             | 5.41 $\pm$ 0.42<br>(0.00)                           | 0.69 $\pm$ 1.46<br>(0.64)                         | -5.08 $\pm$ 1.49<br>(0.001)                         | 0.07 $\pm$ 0.56<br>(0.89)                                          | 1.12 $\pm$ 0.55<br>(0.04)                                        | 50.83 $\pm$ 1.14<br>(0.00)             | 0.94 $\pm$ 0.01                         |
| <b>A-sch</b>             | 2.26 $\pm$ 0.66<br>(0.001)                          | -6.42 $\pm$ 1.69<br>(0.00)                        | -3.51 $\pm$ 1.73<br>(0.04)                          | 1.75 $\pm$ 0.88<br>(0.05)                                          | 5.64 $\pm$ 0.85<br>(0.00)                                        | 50.43 $\pm$ 1.32<br>(0.00)             | 0.89 $\pm$ 0.02                         |
| <b>A-trt</b>             | 0.55 $\pm$ 0.64<br>(0.39)                           | -1.33 $\pm$ 1.90<br>(0.48)                        | -2.35 $\pm$ 1.94<br>(0.23)                          | 2.14 $\pm$ 0.85<br>(0.01)                                          | 2.89 $\pm$ 0.83<br>(0.001)                                       | 50.60 $\pm$ 1.48<br>(0.00)             | 0.92 $\pm$ 0.01                         |

\*The LR Test has Prob> $\chi^2$ <0.00 in all the scales examined.

1  
2  
3  
4  
5  
6  
7  
8  
9  
10  
11  
12  
13  
14  
15  
16  
17  
18  
19  
20  
21  
22  
23  
24  
25  
26  
27  
28  
29  
30  
31  
32  
33  
34  
35  
36  
37  
38  
39  
40  
41  
42  
43  
44  
45  
46  
47  
48  
49  
50  
51  
52  
53  
54  
55  
56  
57  
58  
59  
60

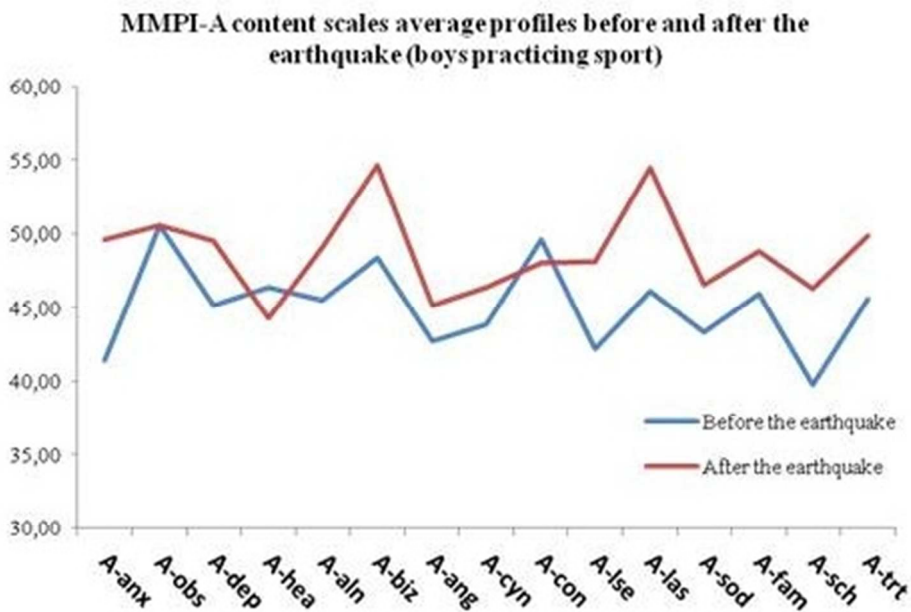

125x86mm (96 x 96 DPI)

Review only

1  
2  
3  
4  
5  
6  
7  
8  
9  
10  
11  
12  
13  
14  
15  
16  
17  
18  
19  
20  
21  
22  
23  
24  
25  
26  
27  
28  
29  
30  
31  
32  
33  
34  
35  
36  
37  
38  
39  
40  
41  
42  
43  
44  
45  
46  
47  
48  
49  
50  
51  
52  
53  
54  
55  
56  
57  
58  
59  
60

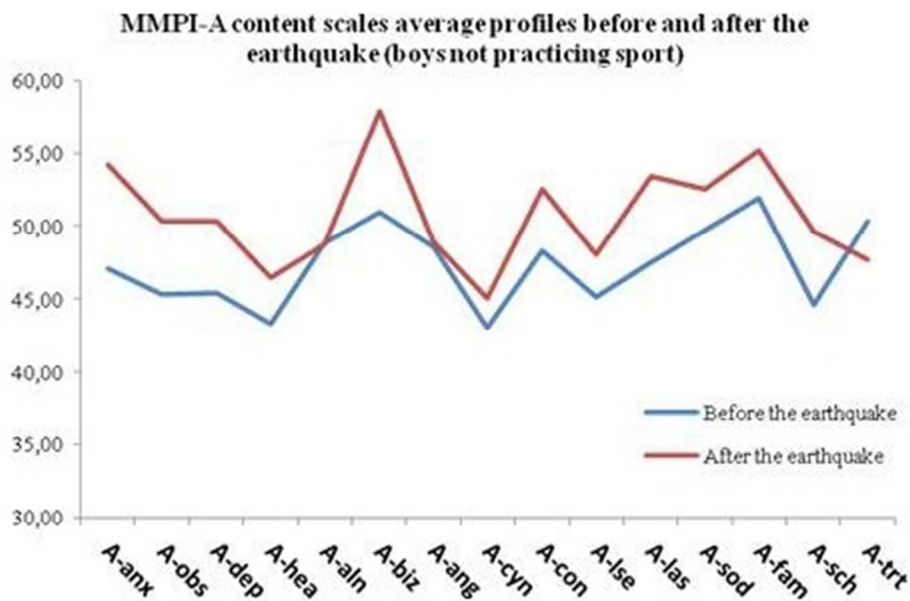

129x88mm (96 x 96 DPI)

Review only

1  
2  
3  
4  
5  
6  
7  
8  
9  
10  
11  
12  
13  
14  
15  
16  
17  
18  
19  
20  
21  
22  
23  
24  
25  
26  
27  
28  
29  
30  
31  
32  
33  
34  
35  
36  
37  
38  
39  
40  
41  
42  
43  
44  
45  
46  
47  
48  
49  
50  
51  
52  
53  
54  
55  
56  
57  
58  
59  
60

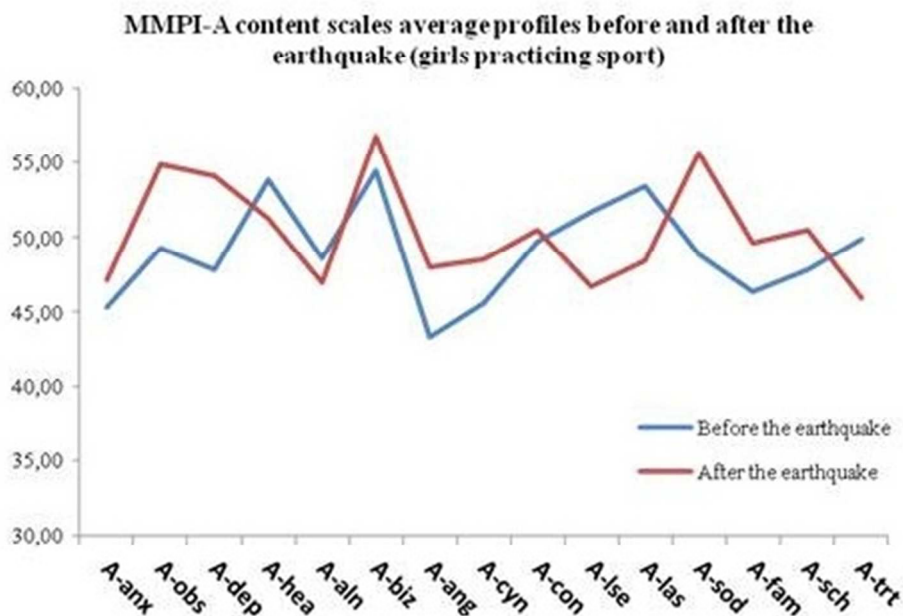

126x90mm (96 x 96 DPI)

view only

1  
2  
3  
4  
5  
6  
7  
8  
9  
10  
11  
12  
13  
14  
15  
16  
17  
18  
19  
20  
21  
22  
23  
24  
25  
26  
27  
28  
29  
30  
31  
32  
33  
34  
35  
36  
37  
38  
39  
40  
41  
42  
43  
44  
45  
46  
47  
48  
49  
50  
51  
52  
53  
54  
55  
56  
57  
58  
59  
60

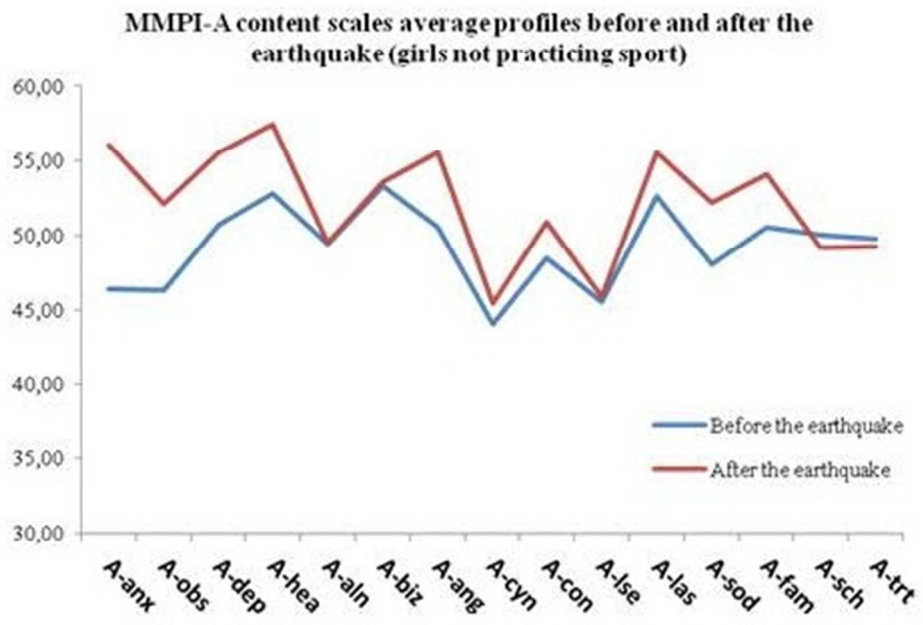

125x90mm (96 x 96 DPI)

view only



**A before and after study on personality assessment of adolescents exposed to the 2009 earthquake in L'Aquila, Italy: influence of sports practice.**

|                                 |                                                                                                                                                                                                                                                                                                                                                                                                                                                                                                                     |
|---------------------------------|---------------------------------------------------------------------------------------------------------------------------------------------------------------------------------------------------------------------------------------------------------------------------------------------------------------------------------------------------------------------------------------------------------------------------------------------------------------------------------------------------------------------|
| Journal:                        | <i>BMJ Open</i>                                                                                                                                                                                                                                                                                                                                                                                                                                                                                                     |
| Manuscript ID:                  | bmjopen-2012-000824.R1                                                                                                                                                                                                                                                                                                                                                                                                                                                                                              |
| Article Type:                   | Research                                                                                                                                                                                                                                                                                                                                                                                                                                                                                                            |
| Date Submitted by the Author:   | 04-Apr-2012                                                                                                                                                                                                                                                                                                                                                                                                                                                                                                         |
| Complete List of Authors:       | Valenti, Marco; University of L'Aquila, Department of Medicine and Public Health; University of L'Aquila, Department of Applied Clinical Sciences<br>Vinciguerra, Maria Giulia; University of L'Aquila, Dept. Applied Clinical Sciences and Faculty of Sports Science<br>Masedu, Francesco; University of L'Aquila, Department of Medicine and Public Health<br>Tiberti, Sergio; University of L'Aquila, Applied Clinical Sciences<br>Sconci, Vittorio; Local Health Agency of the NHS, Department of Mental Health |
| <b>Primary Subject Heading</b>: | Mental health                                                                                                                                                                                                                                                                                                                                                                                                                                                                                                       |
| Secondary Subject Heading:      | Public health, Sports and exercise medicine, Paediatrics                                                                                                                                                                                                                                                                                                                                                                                                                                                            |
| Keywords:                       | MENTAL HEALTH, Child & adolescent psychiatry < PSYCHIATRY, Personality disorders < PSYCHIATRY, PUBLIC HEALTH, disasters                                                                                                                                                                                                                                                                                                                                                                                             |
|                                 |                                                                                                                                                                                                                                                                                                                                                                                                                                                                                                                     |

SCHOLARONE™  
Manuscripts

only

1  
2  
3 **A before and after study on personality assessment in adolescents exposed to the 2009**  
4 **earthquake in L'Aquila, Italy: influence of sports practice.**  
5  
6  
7  
8

9 Marco Valenti <sup>(1)</sup>, Maria Giulia Vinciguerra <sup>(2)</sup>, Francesco Masedu<sup>(1)</sup>, Sergio Tiberti<sup>(1)</sup>, Vittorio  
10 Sconci <sup>(3)</sup>  
11  
12  
13

14  
15  
16 <sup>(1)</sup> Department of Medicine and Public Health, University of L'Aquila, L'Aquila, Italy  
17

18 <sup>(2)</sup> Department of Applied Clinical Sciences and School of Sports Sciences, University of L'Aquila,  
19 L'Aquila, Italy  
20  
21

22 <sup>(3)</sup> Local Health Agency of the National Health System, Department of Mental Health, L'Aquila,  
23 Italy  
24  
25  
26  
27  
28

29 Corresponding author:  
30

31 Marco Valenti M.D.

32 Department of Medicine and Public Health

33 University of L'Aquila

34 Coppito Hospital, Delta 6

35 67100 L'Aquila

36 Email: [marco.valenti@cc.univaq.it](mailto:marco.valenti@cc.univaq.it), phone +390862434659, fax +390862432903  
37  
38  
39  
40  
41

42 **Abstract**

43 **Abstract**

44  
45  
46 **Objective.** To assess and estimate the personality changes that occurred before and after the 2009  
47 earthquake in L'Aquila and to model the ways that the earthquake affected adolescents according to  
48 gender and sport practice. The consequences of earthquakes on psychological health are long-  
49 lasting for portions of the population, depending on age, gender, social conditions and individual  
50 experiences. Sports activities are considered a factor with which to test the overall earthquake  
51 impact on individual and social psychological changes in adolescents.  
52  
53  
54  
55  
56  
57  
58  
59  
60



1  
2  
3 **Design.** Before & after design.  
4

5 **Setting.** Population-based study conducted in L'Aquila, Italy, before and after the 2009 earthquake.  
6

7 **Participants.** Before the earthquake, a random sample of 179 adolescent subjects who either  
8 practised or did not practise sports (71 vs 108 respectively). After the earthquake, of the original  
9 179 subjects, 149 were assessed a second time.  
10  
11

12 **Primary outcome measure.** Minnesota Multiphasic Personality Inventory for Adolescents (MMPI-  
13 A) questionnaire scores, in a supervised environment.  
14  
15

16 **Results.** An unbalanced split plot design, at a 0.05 significance level, was carried out using a linear  
17 mixed model with quake, sex and sports practice as predictive factors. Although the overall scores  
18 indicated no deviant behaviours in the adolescents tested, changes were detected in many individual  
19 content scale scores, including depression (A-dep score Mean±SEM: before quake=47.54±0.73;  
20 after quake=52.67±0.86) and social discomfort (A-sod score Mean±SEM: before  
21 quake=49.91±0.65; after quake=51.72±0.81). The MMPI-A profiles show different impacts of the  
22 earthquake on adolescents according to gender and sport practice.  
23  
24

25 **Conclusions.** The differences detected in MMPI\_A scores raise issues about social policies required  
26 to address the psychological changes in adolescents. The current study supports the idea that sport  
27 should be considered part of a coping strategy to assist adolescents in dealing with the  
28 psychological effects of the earthquakes on their personalities.  
29  
30  
31  
32  
33  
34  
35  
36  
37  
38  
39  
40  
41  
42  
43  
44  
45  
46  
47  
48  
49  
50  
51  
52  
53  
54  
55  
56  
57  
58  
59  
60

## INTRODUCTION

On April 6, 2009, the city of L'Aquila in the Abruzzo region of Italy was devastated by an earthquake. The population suffered injuries, destruction and 308 deaths, with 67,000 persons displaced to the Abruzzo coast or in living in tents. Consequently, the entire community was impacted in terms of material, social and psychological damages, and security and normalcy was further undermined by frequent aftershocks.

According to studies on the psychological health of seismic victims [1-3], the consequences of earthquakes on psychological health are long-lasting for portions of the population, depending on age, gender, social conditions and individual experiences [4]. Earthquakes occur without warning and give the population no opportunity to make psychological adjustments to deal with the calamity, especially in young people [5]. The lack of predictability, the reminders of the destruction and the need to move because of destroyed homes may all result in serious mental health issues, for example, by lessening or exacerbating the emotional reactions associated with the trauma [6].

Several previous studies addressed specific mental disorders, such as post-traumatic stress disorder [7] or other dimensions of people's well-being after loss determined by earthquake [8]. Given the random nature of seismic activity, these studies were not able to perform a pair-wise comparison pre- and post-event. Such comparisons would be useful in developing both collective and individual impact assessments [9] for determining appropriate interventions [10].

Sports activities can be considered a rich context for the construction of personality, and may be able to alleviate symptoms of post-traumatic stress disorders (PTSD), making them a reasonable factor with which to test the overall earthquake impact on individual and social psychological changes in adolescents. However, the literature suggests that more research is required to assess the effectiveness of sports and games in alleviating symptoms of PTSD [11].

The current study contributes to the understanding of the personality profile changes that occur in adolescents after disruptive events like earthquakes. The study includes sports practice as a covariate in exploiting the content scale of the Minnesota Multiphasic Personality Inventory -

1  
2  
3 Adolescents (MMPI-A) [12-14]. Testing began with a cross-sectional survey carried out before the  
4 earthquake in the schools of L'Aquila' district that compared the MMPI-A content scales' scores  
5 for the adolescents based on the adolescents' gender and sports practice factors. The cross-sectional  
6 original design changed to a longitudinal design after the earthquake, addressing the need for an  
7 assessment of the overall effect of the seism on personality in adolescents [15]. In addition to  
8 measuring the effects of the earthquake on MMPI-A content scales' scores, it was also possible to  
9 study the effects of gender and sport practice on the content scales' profiles.

10  
11  
12 The goal of the current study is to assess and estimate the personality changes that occurred before  
13 and after the 2009 earthquake in L'Aquila and to model the ways that the earthquake affected  
14 adolescents according to gender and sport practice.  
15  
16  
17

## 18 19 20 21 22 23 24 25 26 27 **METHODS**

### 28 29 30 **Subjects**

31  
32 This study took advantage of a prior cross-sectional survey conducted on adolescents (14-18 years  
33 old) that addressed the role of sport in preventing deviant behaviours. A comparison was performed  
34 between adolescents who usually practised sports and adolescents who did not practise sports.  
35 Sports practice was defined as practising at least twice per week for a minimum of one hour per  
36 session. The sample recruitment and questionnaire administration took place during February, 2009.  
37 Data analysis had not been performed prior to the earthquake, and the investigation was suspended.  
38 The participants were contacted again a few months after the earthquake, and the follow-up  
39 questionnaires were administered beginning in early January 2010 and concluded in the second half  
40 of May 2010. The questionnaires were administered individually by the same professional  
41 psychologists who administered the questionnaires before the earthquake, all of whom received  
42 specific training on the MMPI-A [16]. Adequate matching of the subjects was ensured by the  
43 experimenters. Exclusion criteria consisted of protocols with a VRIN T-score greater than 74  
44 (considered inconsistent) and protocols containing more than 30 unanswered items. In the present  
45  
46  
47  
48  
49  
50  
51  
52  
53  
54  
55  
56  
57  
58  
59  
60

1  
2  
3 study, 4 girls and 7 boys were excluded during the first administration of the questionnaire and were  
4 removed from further analysis [17].

5  
6  
7 Initially, 179 adolescent subjects (14-18 years old) were randomly sampled from L'Aquila high  
8 schools and were administered the MMPI-A questionnaire in a supervised environment. Participants  
9 included 87 boys and 92 girls, who either practiced sports (71 total subjects) or did not usually  
10 practice sports (108 total subjects). The sample included 60 girls and 48 boys who did not usually  
11 practice sports, compared with 32 girls and 39 boys who did practice sports. The original research  
12 question for the current study was the assessment of the effects of sports practice on the average  
13 MMPI-A content scales' scores. After the earthquake, the research goal was redefined to address  
14 the assessment of the earthquake's psychological impact on adolescents according to gender and  
15 sports practice. Of the original 179 subjects, 149 (70 boys and 79 girls) were assessed a second  
16 time. Of the 149 subjects reassessed, 31 boys and 27 girls continued to practice sports activities. In  
17 the absence or presence of sport practice we recorded, respectively, a follow up loss in the  
18 subgroups of 18.75% and 20.52% for boys, and 13.33% and 15.62 for girls. The post-earthquake  
19 groups resulted quite comparable in terms of severe earthquake outcomes, such as the proportion of  
20 participants experiencing loss of loved ones or friends, relocation and moving to another  
21 home/school.

22  
23  
24 A written informed consent form was provided to the adolescents' parents or to persons possessing  
25 parental rights. The study was conducted according to the Helsinki Declaration.

## 26 27 28 29 30 31 32 33 34 35 36 37 38 39 40 41 42 43 44 45 46 47 **Measures**

48  
49 The subjects' responses were assessed using the Italian version of the MMPI-A content scales using  
50 the uniform T-score conversions (see Table 1), for boys and girls [13]. These conversions allowed  
51 comparison of scores obtained from different scales so that, on average, it was possible to see  
52 changes in the psychological profile of the population examined.  
53  
54  
55  
56  
57  
58  
59  
60

1  
2  
3 Features and characteristics measured by the MMPI or MMPI-A in the assessment of adolescents  
4 serve to describe the teenagers at the moment of testing. Adolescents' test scores often do not  
5 provide the types of data necessary to make accurate long-term predictions concerning personality  
6 functioning [13].  
7

8  
9  
10  
11 MMPI profile changes are due to frequent behavioural changes over time because of the "transient  
12 organisation of the personality" during adolescence [18]. According to the transience perspective,  
13 such psychometric changes are more attributable to the sensitivity of the MMPI to ongoing change  
14 during adolescence than to test structure problems.  
15

16  
17  
18  
19  
20  
21 Considering that the current study estimates the average effects on profile changes after an  
22 earthquake, the use of MMPI-A in the current study is supported by the literature, which indicates  
23 that the MMPI/MMPI-A is best used as a means of deriving an overall estimate and current  
24 description of adolescents' psychological profiles with no predictive long-range aims.  
25  
26  
27  
28  
29

### 30 31 32 **Statistical Analysis**

33  
34 An unbalanced split plot design [19] at a 0.05 significance level was carried out using a linear  
35 mixed model [20] with earthquake, gender, and sports practice as predictive factors. **There was no**  
36 **need to adjust for earthquake outcome variables, as the two groups resulted strictly similar with**  
37 **regard to the proportions of affected participants.** The unbalanced design permitted accounting for  
38 the covariance among the repeated measures. The model was run for each of the response variables  
39 predicted by content scales that were significant in terms of overall Log likelihood ratio ( $p < 0.05$ ).  
40 For each content scale, the intra-class correlation was calculated (see Table 2), ranging from a  
41 minimum for A-cyn (Mean=0.86, SEM=0.02) to a maximum for A-hea (Mean=0.96, SEM=0.006).  
42  
43  
44  
45  
46  
47  
48  
49  
50  
51  
52 The statistical analysis was carried out using the statistical software STATA version 11.  
53  
54

### 55 56 **RESULTS**

57  
58  
59  
60

1  
2  
3 The analysis estimated the impact of the earthquake, gender, sports practice and the two- and three-  
4 way interactions on each of the fifteen content scales of the MMPI-A questionnaire. Table 2 reports  
5 the results of the linear mixed models, which clarify the importance of the earthquake factor on  
6 every content scale except for A-trt (Adolescent negative treatment indication), which is not  
7 significant at  $p=0.387$ . The profile variations for the factors of gender and sport are shown in Fig. 1-  
8 4 to be parallel to the indications of the estimated effects produced by the model. The sport factor  
9 affects the following content scales with statistically significant coefficients: A-anx ( $-3.42\pm 1.58$ ,  
10  $p=0.03$ ), A-obs ( $4.12\pm 1.60$ ,  $p=0.01$ ), A-ang ( $-6.52\pm 1.45$ ,  $p=0.00$ ), A-sod ( $-2.82\pm 1.47$ ,  $p=0.05$ ), A-  
11 fam ( $-5.08\pm 1.49$ ,  $p=0.001$ ), and A-sch ( $-3.50\pm 1.73$ ,  $p=0.04$ ). Despite the expected differences  
12 among those who practice sports, different response patterns were observed for different content  
13 scales and were characterised by different interactions. For A-anx, there were different responses to  
14 the quake according to both gender ( $2.13\pm 0.76$ ,  $p=0.005$ ) and sports practice ( $-3.43\pm 0.78$ ,  $p=0.00$ ).  
15 The last observation indicated that boys who practiced sports after the earthquake showed an  
16 average reduction of 3.43 points in their A-anx scores compared with the boys who did not usually  
17 practice sports. The same protective pattern appears for girls who practiced sports vs. those who did  
18 not practice sports.

19  
20  
21  
22  
23  
24  
25  
26  
27  
28  
29  
30  
31  
32  
33  
34  
35  
36  
37  
38  
39 Girls and boys perform differently with respect to A-dep ( $-4.25\pm 1.60$ ,  $p=0.008$ ), i.e., depression, as  
40 characterised by A-dep, changed in relation to the earthquake and sport factors.

41  
42  
43  
44  
45  
46  
47  
48  
49  
50  
51  
52  
53  
54  
55  
56  
57  
58  
59  
60  
As measured by the MMPI-A, the situation for the adolescents living in L'Aquila is worse two  
years after the earthquake compared with before the earthquake. The factors negatively affected  
post-earthquake include personality discomfort; low self esteem; anger; family issues; problems at  
school, with different grades for boys and girls [21]; and decreased sports participation rates.

Social discomfort and family problems, among other scales examined, behaved differently,  
according to the different interactions of boys and girls with the earthquake impact factor. These  
factors are sources of concern for decision makers and administrators because they are usually  
associated with communication problems between the most important actors in the education of

1  
2  
3 adolescents, namely, the family and the school. The problems observed above are expected, given  
4  
5 the lack of opportunity to encounter other adolescents as well as lack of important leisure  
6  
7 experiences due to the destruction of the urban environment [22].  
8

9  
10 Unexpectedly, anger increased over time (see Table 2) but was not moderated by the earthquake-  
11  
12 sport interaction ( $p=0.20$ ). The variable A-cyn, which describes misanthropic beliefs according to  
13  
14 MMPI-A, does not show a statistically significant interaction between the earthquake occurrence  
15  
16 and sport activity ( $p=0.17$ ), i.e., there is no group-specific trend of adolescents who practice sports  
17  
18 compared with the adolescents who do not practice sports. A summary of the sport factor indicates  
19  
20 that there is no statistically significant interaction between the earthquake's impact and the sport  
21  
22 variable for A-dep, A-ahn, A-ang, A-cyn, A-lse, or A-fam (see Table 2).  
23  
24  
25  
26

## 27 DISCUSSION

28  
29 The primary purpose of this study was the public health concern of adolescents' well-being post-  
30  
31 earthquake rather than an examination of psychopathologies in adolescents. The study did not  
32  
33 include "pathological subjects"; thus, the scores of the MMPI-A content scales were not high in  
34  
35 magnitude but still presented significant variations in the subjects' personality profiles [23].  
36  
37

38  
39 Despite the unusual context of its use, the current application of the MMPI-A appears to be  
40  
41 promising as a method of population analysis after disasters because of the rich psychological  
42  
43 profile descriptions obtained and the identification of critical psychological dimensions among the  
44  
45 population [24]. On the other hand, the use of MMPI-A in studies after disaster can be criticized, as  
46  
47 the use of a 478-item questionnaire appears time-consuming and inadequate to fit with survivors'  
48  
49 need to regain control over their own lives. In these circumstances shorter instruments should be  
50  
51 preferable.  
52

53  
54 The current analysis suggests that amateur sport practice may have a role in addressing  
55  
56 psychological and personality problems that are associated with or exacerbated by the disruption of  
57  
58 everyday life due to natural catastrophic events. When based on expectations about one's own time  
59  
60

1  
2  
3 and leisure, choosing to practice sports appears to reveal deep psychological patterns that affect  
4  
5 social interaction and personal self-estimation. The comparisons in this study provide evidence that  
6  
7 adolescents exposed to sports show a better response to extreme situations such as earthquakes  
8  
9 when compared with adolescents not exposed to sports.  
10

11 The evidence presented above indicates a possible method for coping with the social discomfort and  
12  
13 other psychological issues experienced by adolescents who suffer through natural catastrophes [25].

14 The inclusion of sports practice could be a qualifying feature of the catastrophe managing policy for  
15  
16 adolescents.  
17

18  
19  
20 Suggestions for further study include estimation of the “elasticity” of the personality profile  
21  
22 changes, i.e., identification of the amount of time required to return to the pre-quake mental health  
23  
24 condition and the eventual memory effects of the earthquake regarding the items involved in the  
25  
26 analysis [26].  
27

28  
29 The limitations of the present study include the restriction of analysis to the factors of gender and  
30  
31 sports practice that were chosen at the study onset. Nevertheless, the present study promoted the  
32  
33 evaluation of important aspects of adolescent mental health that are not currently being addressed  
34  
35 by the healthcare decision makers.  
36

37  
38 A **main** drawback of this study is the lack of adjustment for the socio-economic status of the  
39  
40 subjects [27]. The cross-sectional survey carried out before the earthquake used the density of  
41  
42 inhabitants per room (DIR), or the ratio of people dwelling in a house and the number of rooms  
43  
44 occupied including kitchen, living room and bathrooms, as a proxy covariate of socio-economic  
45  
46 status. The inclusion of DIR allowed a basic knowledge of the social condition of all the  
47  
48 adolescents interviewed. After the earthquake, DIR was no longer representative of socio-economic  
49  
50 status for most subjects because these subjects were no longer able to precisely indicate their  
51  
52 housing status. This consideration forced the authors to discard DIR as a relevant variable.  
53  
54 However, it is plausible that this lack of information parallels the behaviour of the factor  
55  
56 earthquake. Statistically speaking, socio-economic status is expected to have some collinearity with  
57  
58  
59  
60



1  
2  
3 the quake factor [28], but this cannot be accounted for exactly in the present study, and it is not  
4 possible to suggest a design that accounts for these factors because of the randomness of  
5 earthquakes' occurrences.  
6  
7  
8

9  
10 In conclusion, the results of the current study show an overall positive impact of sports practice on  
11 adolescents' psychological response to natural disasters.  
12  
13

### 14 15 16 **LICENCE FOR PUBLICATION**

17  
18 The Corresponding Author has the right to grant on behalf of all authors and does grant on behalf of  
19 all authors, an exclusive licence on a worldwide basis to the BMJ Publishing Group Ltd and its  
20 Licensees to permit this article (if accepted) to be published in BMJ Open editions and any other  
21 BMJPGGL products to exploit all subsidiary rights, as set out in licence  
22 (<http://group.bmj.com/products/journals/instructions-for-authors/licence-forms/>).  
23  
24  
25  
26  
27  
28  
29  
30  
31

### 32 **COMPETING INTEREST**

33  
34 None to declare.  
35  
36  
37

### 38 **FUNDING STATEMENT**

39  
40 This research received no specific grant from any funding agency in the public, commercial or not-  
41 for-profit sectors.  
42  
43  
44  
45  
46

### 47 **CONTRIBUTORSHIP STATEMENT**

48  
49 Marco Valenti was the principal investigator, conceived and designed the study protocol, and  
50 provided final interpretation of data.  
51  
52

53  
54 Maria Giulia Vinciguerra participated in designing the study, questionnaire administration, and  
55 interpretation of data.  
56  
57

58  
59 Francesco Masedu performed the statistical data analysis.  
60

1  
2  
3  
4  
5  
6  
7  
8  
9  
10  
11  
12  
13  
14  
15  
16  
17  
18  
19  
20  
21  
22  
23  
24  
25  
26  
27  
28  
29  
30  
31  
32  
33  
34  
35  
36  
37  
38  
39  
40  
41  
42  
43  
44  
45  
46  
47  
48  
49  
50  
51  
52  
53  
54  
55  
56  
57  
58  
59  
60

Sergio Tiberti contributed to the study design and interpretation of results.

Vittorio Sconci participated in designing the study protocol and interpretation of data.

All authors gave substantial contribution to manuscript writing and editing.

For peer review only

## REFERENCES

- 1 Asarnow J, Glynn S, Pynoos RS, et al. When the earth stops shaking: Earthquake sequelae among children diagnosed for pre-earthquake psychopathology. *J Am Acad Child Adolesc Psychiatry*. 1999;**38**:1016-23.
- 2 Carr VJ, Lewin TJ, Welster RA, et al. A synthesis of the findings from the Quake Impact Study: a two-year investigation of the psychosocial sequelae of the 1989 Newcastle earthquake. *Soc Psychiatry Psychiatr Epidemiol*. 1997;**32**:123-36
- 3 Casacchia M, Roncone R, Pollice R. The narrative epidemiology of L'Aquila 2009 earthquake. *Epidemiology and Psychiatric Science* 2012; **21**:13-21
- 4 Tsai K, Chou P, Chou FH, et al. Three-year follow up study of the relationship between posttraumatic stress symptoms and quality of life among earthquake survivors in Yu-Chi, Taiwan. *Journal of Psychiatric Research* 2007, **41**:90-96
- 5 Shannon MP, Lonigan CJ, Finch AJ Jr., et al. Children exposed to disaster: I. Epidemiology of post-traumatic symptoms and symptom profiles. *J Am Acad Child Adolesc Psychiatry*. 1994;**33**,80–93.
- 6 Zhang Z, Shi Z, Wang L, et al. One year later: Mental health problems among survivors in hard-hit areas of the Wenchuan earthquake. *Public Health*. 2011;**125**:293-300.
- 7 Dell'Osso L, Carmassi C, Massimetti G, et al. Full and partial PTSD among young adult survivors 10 months after the L'Aquila 2009 earthquake: gender differences. *J Affect Disord*. 2011;**131**:79-83.
- 8 Armenian HK, Morikawa M, Melkonian AK, et al. Loss as a determinant of PTSD in a cohort of adult survivors of the 1988 earthquake in Armenia: implications for policy. *Acta Psychiatr Scand*. 2000;**102**:58-64.
- 9 Ambrose PA. Challenges for mental health service providers: The perspective of managed care organizations. In: Butcher JN, Ed. *Personality assessment in managed care: Using the MMPI-2 in treatment planning*. New York: Oxford University Press 1997:61-72.

- 1  
2  
3 10 Chandra A, Acosta JD. Disaster Recovery Also Involves Human Recovery. *JAMA*.  
4  
5 2010;**304**:1608-9.  
6  
7 11 Lawrence S, De Silva M, Henley R. Sports and games for post-traumatic stress disorder  
8  
9 (PTSD). *Cochrane Database Syst Rev* 2010;20;(1):CD007171  
10  
11  
12 12 Butcher JN, Williams CL, Graham JR, et al. Il MMPI per gli adolescenti (Sirigatti S,  
13  
14 Pancheri P, Eds). Firenze, Giunti OS, 2001.  
15  
16 13 Archer RP. MMPI-A: Assessing Adolescents Psychopathology. London, Lawrence Elbaum  
17  
18 Associates Publishers, 2005.  
19  
20 14 Butcher JN, Williams CL, Graham JR, et al. Manual for administration, scoring, and  
21  
22 interpretation of the Minnesota Multiphasic Personality Inventory for Adolescents: MMPI-  
23  
24 A. Minneapolis, University of Minnesota Press, 1992.  
25  
26 15 Twisk JWR. Applied longitudinal data analysis for epidemiology. Cambridge, Cambridge  
27  
28 University Press, 2003.  
29  
30 16 Allard G, Faust D. Errors in scoring objective personality tests. *Assessment*. 2000;**7**:119-29.  
31  
32 17 Hand CG, Archer RP, Handel RW, et al. The classification accuracy of the Minnesota  
33  
34 Multiphasic Personality Inventory-Adolescent: effects of modifying the normative sample.  
35  
36 *Assessment*. 2007;**14**:80-5.  
37  
38 18 Hathaway SR, Monachesi ED. Adolescent personality and behavior: MMPI patterns of  
39  
40 normal, delinquent, dropout, and other outcomes. Minneapolis, University of Minnesota  
41  
42 Press, 1963.  
43  
44 19 Chou FH, Wu HC. Chou P, et al. Epidemiologic psychiatric studies on post-disaster impact  
45  
46 among Chi-Chi earthquake survivors in Yu-Chi, Taiwan. *Psychiatry Clin Neurosci*.  
47  
48 2007;**61**:370-8.  
49  
50 20 Fitzmaurice G, Laird NM, Ware JH. Applied longitudinal data analysis. Hoboken NJ, John  
51  
52 Wiley & Sons 2004:188-189.  
53  
54  
55  
56  
57  
58  
59  
60

- 1  
2  
3 21 Arbisi PA, Butcher JN. Relationship between personality and health symptoms: Use of the  
4 MMPI-2 in medical assessments. *Int J Clin Health Psychol*. 2004;**4**:571-95.  
5  
6  
7 22 Oyama M, Nakamura K, Suda Y, et al. Social network disruption as a major factor  
8 associated with psychological distress 3 years after the 2004 Niigata-Chuetsu earthquake in  
9 Japan. *Environ Health Prev Med*. 2011; Jun 28 Epub ahead of print.  
10  
11  
12 23 Piko BF, Keresztes N. Self-perceived health among early adolescents: role of psychosocial  
13 factors. *Pediatr Int*. 2007;**49**:577-83.  
14  
15  
16 24 Bowling A. Mode of questionnaire administration can have serious effects on data quality. *J*  
17 *Public Health*. 2005;**27**:281-91.  
18  
19  
20 25 Weinberger M, Oddone EZ, Samsa GP, et al. Are health-related quality of life measures  
21 affected by mode of administration? *J Clin Epidemiol*. 1996;**49**:135-40.  
22  
23  
24 26 Nivolianitou Z, Synodinou B. Towards emergency management of natural disasters and  
25 critical accidents: The Greek experience. *J Environ Manag*. 2011;**92**:2657-65  
26  
27  
28 27 Weiss JW, Mouttapa M, Cen S, et al. Longitudinal effects of hostility, depression, and  
29 bullying on adolescent smoking initiation. *J Adolesc Health*. 2011;**48**:591-6.  
30  
31  
32 28 Ahern J, Galea S. Social context and depression after a disaster: the role of income  
33 inequality. *J Epidemiol Community Health*. 2006;**60**:766-70.  
34  
35  
36  
37  
38  
39  
40  
41  
42  
43  
44  
45  
46  
47  
48  
49  
50  
51  
52  
53  
54  
55  
56  
57  
58  
59  
60

Table 1. Average uniform T-scores for the MMPI-A content scales

|                 |                  | A-anx            | A-obs | A-dep | A-hea | A-alm | A-biz | A-ang | A-cyn | A-con | A-lse | A-las | A-sod | A-fam | A-sch | A-trt |       |       |       |
|-----------------|------------------|------------------|-------|-------|-------|-------|-------|-------|-------|-------|-------|-------|-------|-------|-------|-------|-------|-------|-------|
| Boys            | Before the quake | No               | Mean  | 47.10 | 45.33 | 45.38 | 43.27 | 48.88 | 50.98 | 48.63 | 43.00 | 48.35 | 45.13 | 47.56 | 49.75 | 51.92 | 44.58 | 50.38 |       |
|                 |                  | SEM              | 1.58  | 1.41  | 1.41  | 1.05  | 1.58  | 1.69  | 1.32  | 1.32  | 1.42  | 1.55  | 1.13  | 1.27  | 1.43  | 1.68  | 1.84  |       |       |
|                 | Sport Practice   | No               | Mean  | 41.41 | 50.56 | 45.15 | 46.36 | 45.54 | 48.38 | 42.74 | 44.00 | 49.56 | 42.18 | 46.13 | 43.33 | 45.95 | 39.79 | 45.56 |       |
|                 |                  | SEM              | 1.21  | 1.47  | 1.55  | 1.52  | 1.90  | 2.05  | 1.19  | 1.30  | 1.63  | 1.13  | 1.59  | 1.28  | 1.47  | 1.04  | 1.69  |       |       |
|                 | After the quake  | No               | Mean  | 54.23 | 50.36 | 50.38 | 46.44 | 48.79 | 57.95 | 48.90 | 45.00 | 52.51 | 48.08 | 53.46 | 52.59 | 55.21 | 49.64 | 47.69 |       |
|                 |                  | SEM              | 1.51  | 1.59  | 1.61  | 1.36  | 1.91  | 1.87  | 1.65  | 1.40  | 1.63  | 1.43  | 1.81  | 1.85  | 1.52  | 2.21  | 1.96  |       |       |
|                 | Sport Practice   | No               | Mean  | 49.58 | 50.52 | 49.48 | 44.29 | 49.10 | 54.61 | 45.13 | 46.39 | 48.00 | 48.13 | 54.42 | 46.55 | 48.84 | 46.29 | 49.84 |       |
|                 |                  | SEM              | 1.77  | 1.77  | 1.52  | 1.33  | 2.30  | 2.01  | 1.27  | 1.93  | 1.75  | 1.80  | 1.97  | 1.50  | 1.47  | 1.46  | 1.82  |       |       |
|                 | Girls            | Before the quake | No    | Mean  | 46.42 | 46.33 | 50.68 | 52.80 | 49.43 | 53.32 | 50.53 | 44.08 | 48.48 | 45.52 | 52.60 | 48.00 | 50.52 | 49.97 | 49.72 |
|                 |                  |                  | SEM   | 1.10  | 1.27  | 1.29  | 1.07  | 1.53  | 1.62  | 1.22  | 1.06  | 1.35  | 1.12  | 1.45  | 1.11  | 1.10  | 1.45  | 1.43  |       |
|                 |                  | Sport Practice   | No    | Mean  | 45.34 | 49.31 | 47.81 | 53.84 | 48.63 | 54.41 | 43.34 | 45.63 | 49.69 | 51.72 | 53.41 | 48.88 | 46.34 | 47.78 | 49.91 |
|                 |                  |                  | SEM   | 1.85  | 1.72  | 1.50  | 1.67  | 2.01  | 2.13  | 1.54  | 1.65  | 1.78  | 2.24  | 2.42  | 1.50  | 1.44  | 1.48  | 2.21  |       |
| After the quake |                  | No               | Mean  | 56.00 | 52.04 | 55.56 | 57.40 | 49.52 | 53.58 | 55.56 | 45.40 | 50.88 | 45.87 | 55.48 | 52.13 | 54.02 | 49.17 | 49.21 |       |
|                 |                  | SEM              | 1.53  | 1.37  | 1.64  | 1.12  | 1.58  | 1.45  | 1.31  | 1.54  | 1.49  | 1.17  | 1.52  | 1.14  | 1.21  | 1.58  | 1.77  |       |       |
| Sport Practice  |                  | No               | Mean  | 47.11 | 54.85 | 54.07 | 51.30 | 46.93 | 56.78 | 48.00 | 48.52 | 50.44 | 46.74 | 48.41 | 55.63 | 49.63 | 50.48 | 45.96 |       |
|                 |                  | SEM              | 1.61  | 1.74  | 1.82  | 1.55  | 2.11  | 1.78  | 1.37  | 1.29  | 1.68  | 1.42  | 2.23  | 1.94  | 2.09  | 2.26  | 2.19  |       |       |

## Content Scales Legend

**A-anx:** Anxiety Scale  
**A-obs:** Obsessiveness Scale  
**A-dep:** Depression Scale  
**A-hea:** Health Concerns Scale  
**A-alm:** Alienation Scale  
**A-biz:** Bizarre Mentation Scale  
**A-ang:** Anger Scale  
**A-cyn:** Cynism Scale  
**A-con:** Conduct problems Scale  
**A-lse:** Low Self-Esteem Scale  
**A-las:** Low aspirations Scale  
**A-sod:** Social Discomfort Scale  
**A-fam:** Family Problems Scale  
**A-sch:** School problems Scale  
**A-trt:** Negative Treatment Indicators Scale

**Table 2.** Uniform T-Score Response Linear Mixed Models for MMPI-A content scales\*.

**Model coefficients**

| Uniform T-Score Response | $\beta_{\text{quake}} \pm \text{SEM}$<br>(Prob> z ) | $\beta_{\text{sex}} \pm \text{SEM}$<br>(Prob> z ) | $\beta_{\text{sport}} \pm \text{SEM}$<br>(Prob> z ) | $\beta_{\text{quake} * \text{sport}} \pm \text{SEM}$<br>(Prob> z ) | $\beta_{\text{quake} * \text{sex}} \pm \text{SEM}$<br>(Prob> z ) | $\beta_0 \pm \text{SEM}$<br>(Prob> z ) | Intraclass Correlation<br>ICC $\pm$ SEM |
|--------------------------|-----------------------------------------------------|---------------------------------------------------|-----------------------------------------------------|--------------------------------------------------------------------|------------------------------------------------------------------|----------------------------------------|-----------------------------------------|
| <b>A-anx</b>             | 10.24 $\pm$ 0.59<br>(0.00)                          | -1.15 $\pm$ 1.54<br>(0.46)                        | -3.42 $\pm$ 1.58<br>(0.03)                          | -3.44 $\pm$ 0.78<br>(0.00)                                         | 2.13 $\pm$ 0.76<br>(0.005)                                       | 47.23 $\pm$ 1.20<br>(0.00)             | 0.89 $\pm$ 0.02                         |
| <b>A-obs</b>             | 9.24 $\pm$ 0.45<br>(0.00)                           | -0.10 $\pm$ 1.56<br>(0.95)                        | 4.12 $\pm$ 1.60<br>(0.01)                           | -2.63 $\pm$ 0.60<br>(0.00)                                         | -2.28 $\pm$ 0.59<br>(0.00)                                       | 45.93 $\pm$ 1.22<br>(0.00)             | 0.94 $\pm$ 0.01                         |
| <b>A-dep</b>             | 7.52 $\pm$ 0.53<br>(0.00)                           | -4.25 $\pm$ 1.60<br>(0.01)                        | -1.52 $\pm$ 1.63<br>(0.35)                          | 0.64 $\pm$ 0.71<br>(0.37)                                          | 0.31 $\pm$ 0.70<br>(0.66)                                        | 50.21 $\pm$ 1.24<br>(0.00)             | 0.92 $\pm$ 0.01                         |
| <b>A-hea</b>             | 5.97 $\pm$ 0.31<br>(0.00)                           | -8.72 $\pm$ 1.32<br>(0.00)                        | 2.08 $\pm$ 1.35<br>(0.12)                           | -5.48 $\pm$ 0.41<br>(0.00)                                         | 0.06 $\pm$ 0.40<br>(0.89)                                        | 52.44 $\pm$ 1.03<br>(0.00)             | 0.96 $\pm$ 0.01                         |
| <b>A-aln</b>             | 1.96 $\pm$ 0.62<br>(0.002)                          | -1.56 $\pm$ 1.88<br>(0.002)                       | -2.09 $\pm$ 1.92<br>(0.28)                          | 1.54 $\pm$ 0.83<br>(0.07)                                          | 2.98 $\pm$ 0.81<br>(0.00)                                        | 49.88 $\pm$ 1.46<br>(0.00)             | 0.92 $\pm$ 0.01                         |
| <b>A-biz</b>             | 3.51 $\pm$ 0.45<br>(0.00)                           | -3.80 $\pm$ 1.90<br>(0.05)                        | -0.78 $\pm$ 1.94<br>(0.68)                          | 1.41 $\pm$ 0.60<br>(0.02)                                          | 6.83 $\pm$ 0.58<br>(0.00)                                        | 53.97 $\pm$ 1.48<br>(0.00)             | 0.96 $\pm$ 0.01                         |
| <b>A-ang</b>             | 7.09 $\pm$ 0.41<br>(0.00)                           | -1.38 $\pm$ 1.42<br>(0.33)                        | -6.52 $\pm$ 1.45<br>(0.00)                          | 0.70 $\pm$ 0.55<br>(0.20)                                          | -3.41 $\pm$ 0.54<br>(0.00)                                       | 50.30 $\pm$ 1.10<br>(0.00)             | 0.94 $\pm$ 0.01                         |
| <b>A-cyn</b>             | 3.46 $\pm$ 0.62<br>(0.00)                           | -1.34 $\pm$ 1.44<br>(0.35)                        | 1.20 $\pm$ 1.47<br>(0.41)                           | 1.14 $\pm$ 0.82<br>(0.17)                                          | 0.94 $\pm$ 0.81<br>(0.24)                                        | 44.20 $\pm$ 1.12<br>(0.00)             | 0.87 $\pm$ 0.02                         |
| <b>A-con</b>             | 5.75 $\pm$ 0.40<br>(0.00)                           | -0.13 $\pm$ 1.62<br>(0.94)                        | 1.20 $\pm$ 1.65<br>(0.47)                           | -3.44 $\pm$ 0.53<br>(0.00)                                         | 0.64 $\pm$ 0.52<br>(0.21)                                        | 48.48 $\pm$ 1.26<br>(0.00)             | 0.96 $\pm$ 0.01                         |
| <b>A-lse</b>             | 1.25 $\pm$ 0.49<br>(0.01)                           | -4.02 $\pm$ 1.53<br>(0.01)                        | 1.55 $\pm$ 1.56<br>(0.32)                           | -1.12 $\pm$ 0.65<br>(0.08)                                         | 6.71 $\pm$ 0.64<br>(0.00)                                        | 47.13 $\pm$ 1.19<br>(0.00)             | 0.93 $\pm$ 0.01                         |
| <b>A-las</b>             | 3.69 $\pm$ 0.65<br>(0.00)                           | -5.93 $\pm$ 1.73<br>(0.001)                       | -0.33 $\pm$ 1.77<br>(0.85)                          | -1.71 $\pm$ 0.87<br>(0.04)                                         | 6.74 $\pm$ 0.85<br>(0.00)                                        | 52.99 $\pm$ 1.35<br>(0.00)             | 0.89 $\pm$ 0.01                         |
| <b>A-sod</b>             | 6.46 $\pm$ 0.47<br>(0.00)                           | -1.15 $\pm$ 1.44<br>(0.43)                        | -2.83 $\pm$ 1.47<br>(0.05)                          | 1.83 $\pm$ 0.63<br>(0.004)                                         | -1.62 $\pm$ 0.61<br>(0.01)                                       | 49.29 $\pm$ 1.12<br>(0.00)             | 0.92 $\pm$ 0.01                         |
| <b>A-fam</b>             | 5.41 $\pm$ 0.42<br>(0.00)                           | 0.69 $\pm$ 1.46<br>(0.64)                         | -5.08 $\pm$ 1.49<br>(0.001)                         | 0.07 $\pm$ 0.56<br>(0.89)                                          | 1.12 $\pm$ 0.55<br>(0.04)                                        | 50.83 $\pm$ 1.14<br>(0.00)             | 0.94 $\pm$ 0.01                         |
| <b>A-sch</b>             | 2.26 $\pm$ 0.66<br>(0.001)                          | -6.42 $\pm$ 1.69<br>(0.00)                        | -3.51 $\pm$ 1.73<br>(0.04)                          | 1.75 $\pm$ 0.88<br>(0.05)                                          | 5.64 $\pm$ 0.85<br>(0.00)                                        | 50.43 $\pm$ 1.32<br>(0.00)             | 0.89 $\pm$ 0.02                         |
| <b>A-trt</b>             | 0.55 $\pm$ 0.64<br>(0.39)                           | -1.33 $\pm$ 1.90<br>(0.48)                        | -2.35 $\pm$ 1.94<br>(0.23)                          | 2.14 $\pm$ 0.85<br>(0.01)                                          | 2.89 $\pm$ 0.83<br>(0.001)                                       | 50.60 $\pm$ 1.48<br>(0.00)             | 0.92 $\pm$ 0.01                         |

\*The LR Test has Prob> $\chi^2$ <0.00 in all the scales examined.

1  
2  
3  
4  
5  
6  
7  
8  
9  
10  
11  
12  
13  
14  
15  
16  
17  
18  
19  
20  
21  
22  
23  
24  
25  
26  
27  
28  
29  
30  
31  
32  
33  
34  
35  
36  
37  
38  
39  
40  
41  
42  
43  
44  
45  
46  
47  
48  
49

Fig. 1

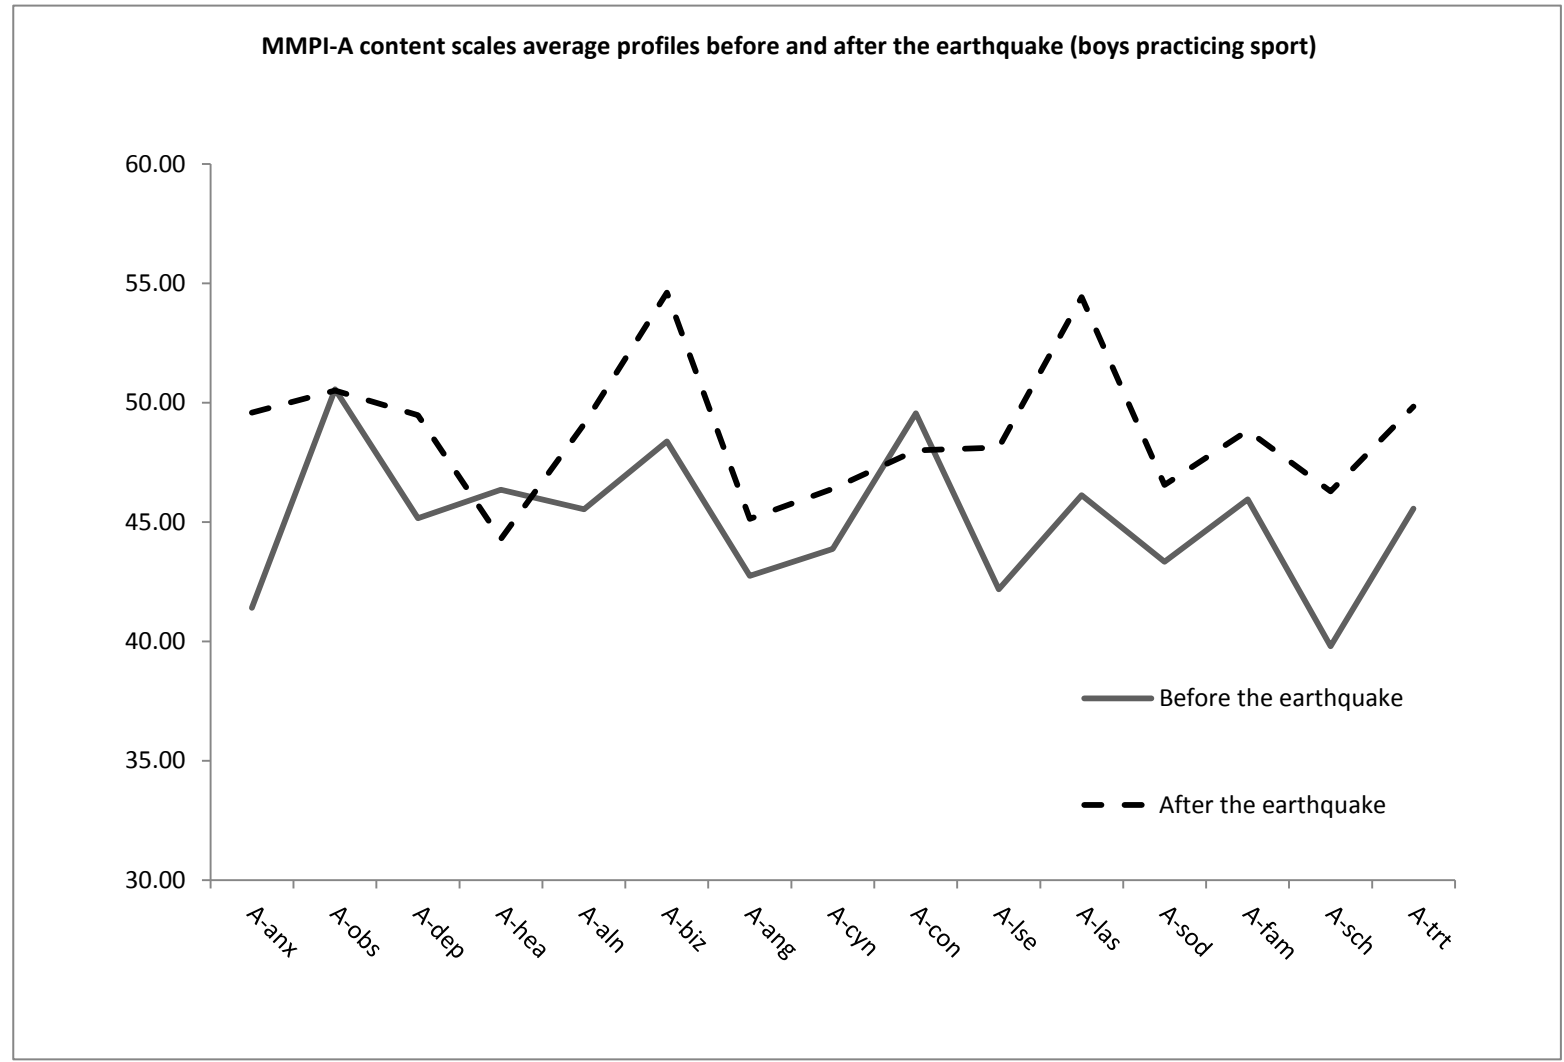



Fig. 2

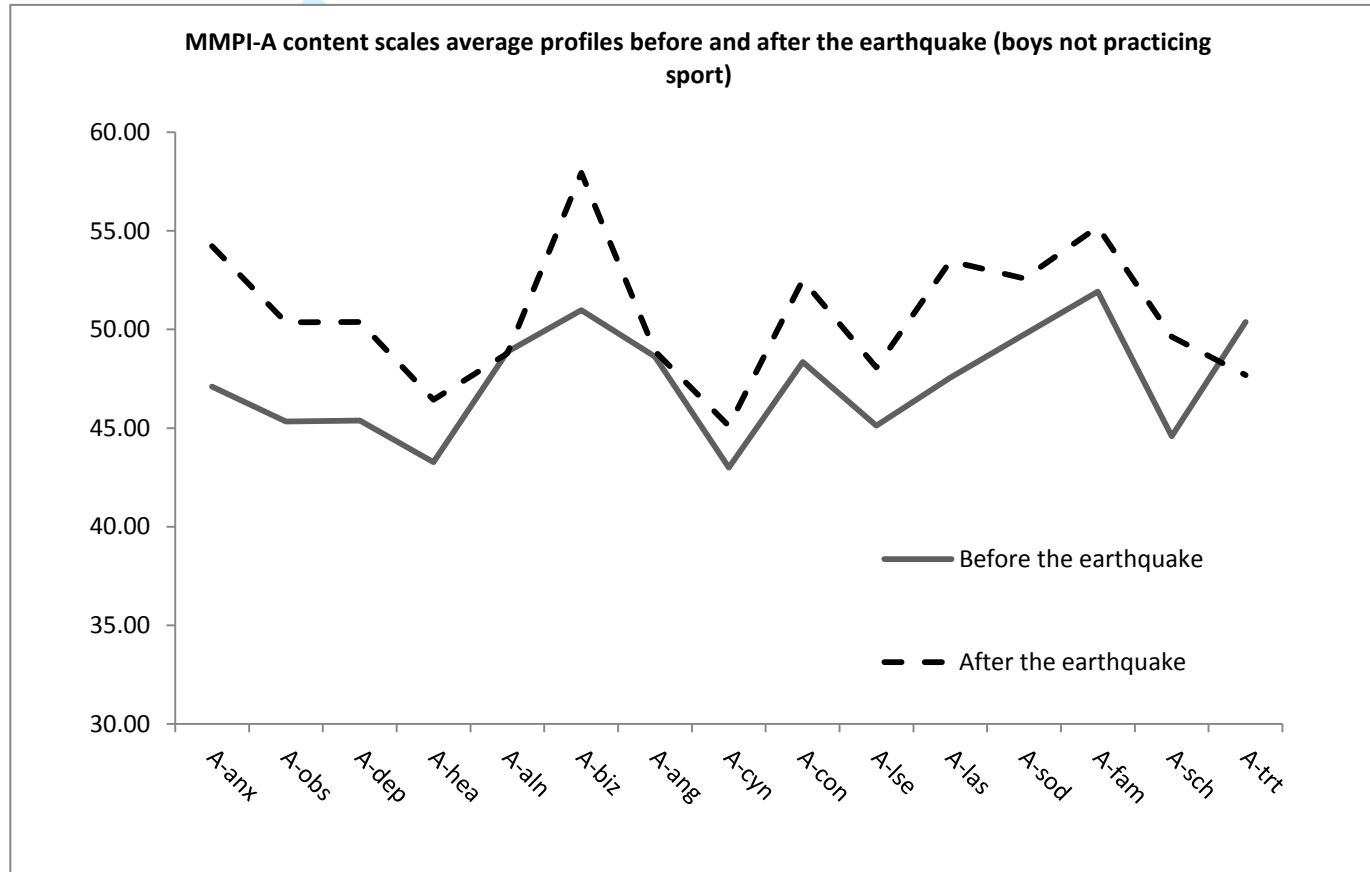

Fig. 3

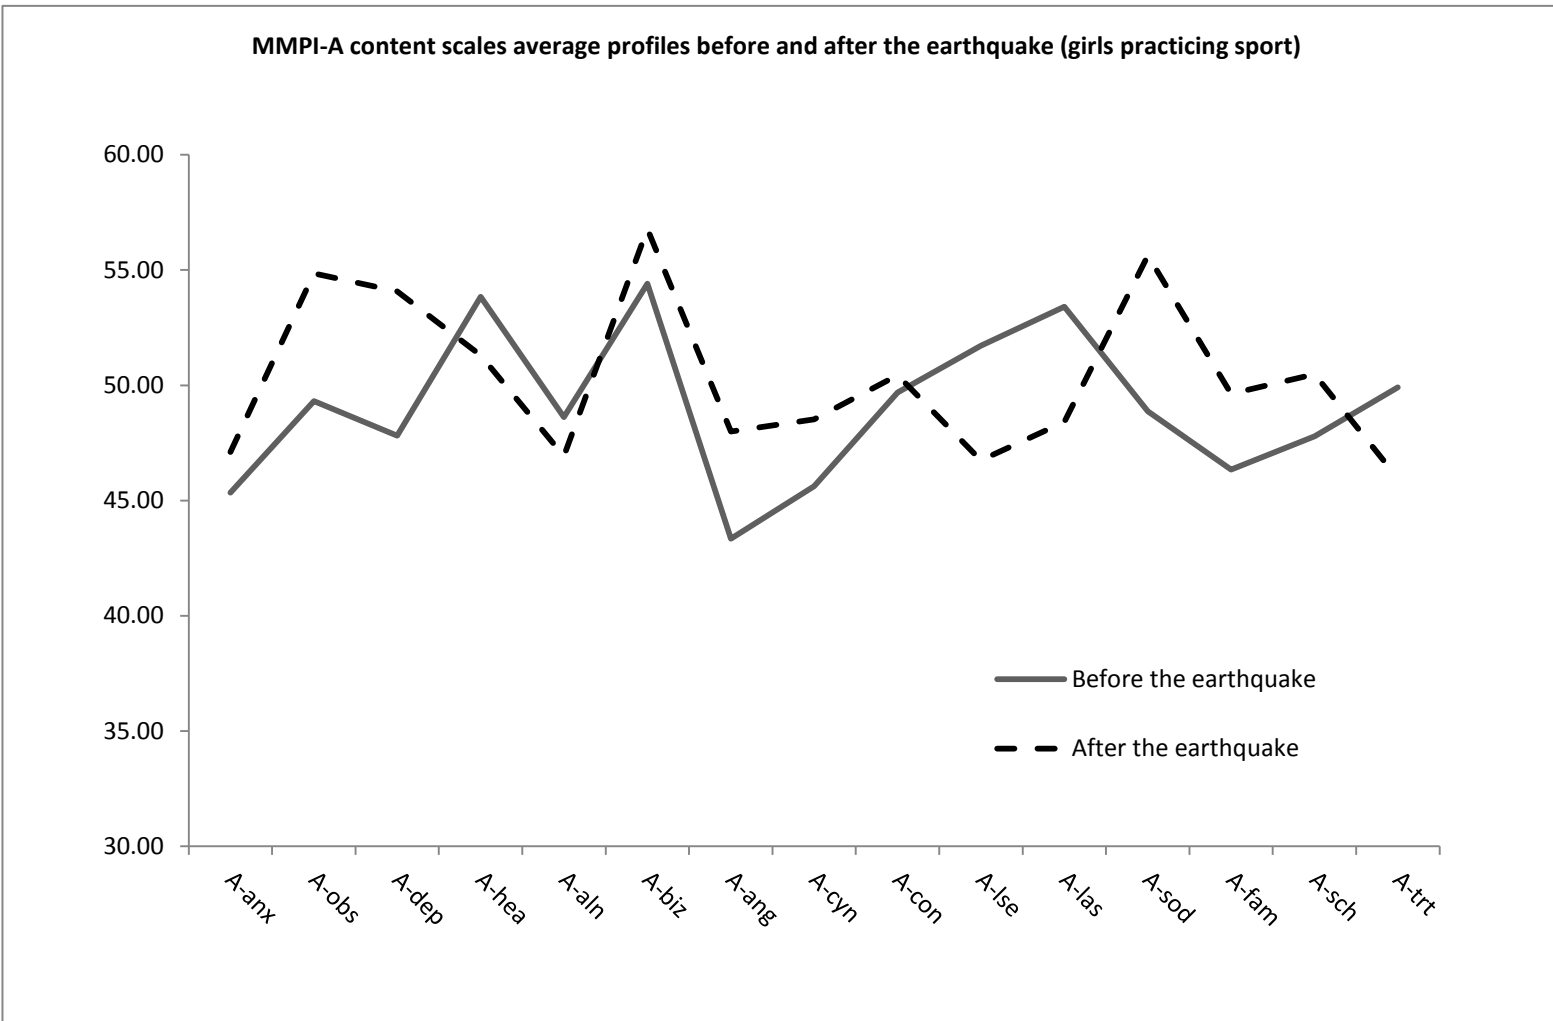

Fig. 4

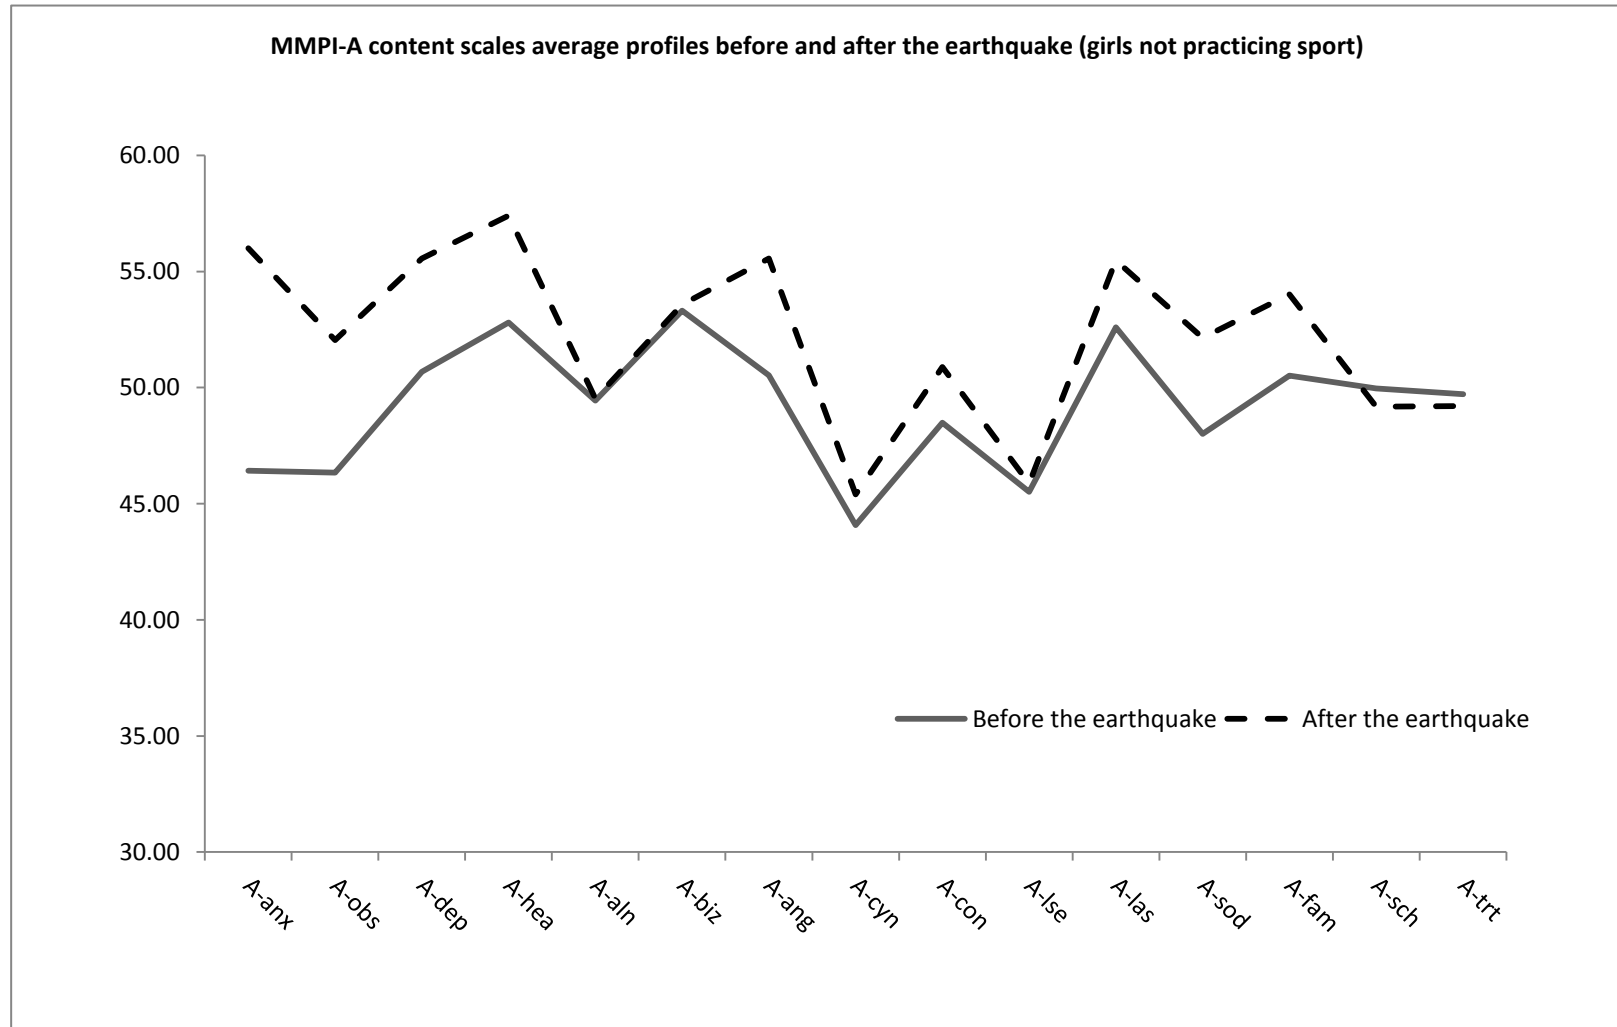

Supplement: bmjopen-2012-000824.draft_revisions.pdf [file bmjopen-2012-000824.draft_revisions.pdf]
